# Supplementary material for: Manganese-catalyzed direct C2-allylation of indoles
Source: Royal Society of Chemistry journal article supplement (doi:10.1039/c8qo00674a), 2018-01-01

## ***SUPPORTING INFORMATION***

### **Manganese-Catalyzed Direct C2-Allylation of Indoles**

Shang Wu,<sup>\*a</sup> Quanlu Yang,<sup>\*b</sup> Qinzheng Hu,<sup>a</sup> Yanbin Wang,<sup>a</sup> Lihua Chen,<sup>a</sup> Hong Zhang,<sup>a</sup>

Lan Wu<sup>\*a</sup> and Jia Li<sup>a</sup>

#### **Contents**

|                                                 |    |
|-------------------------------------------------|----|
| 1. General Information.....                     | 1  |
| 2. General procedure.....                       | 3  |
| 3. Extensive substrate test.....                | 3  |
| 4. Gram-scale test.....                         | 3  |
| 5. Mechanism studies.....                       | 4  |
| 6. Characterization data for new compounds..... | 8  |
| 7. NMR Spectra for products.....                | 23 |

#### **1. General Information**

All reactions were carried out under an atmosphere of air atmosphere with dry solvents in flame-dried glassware unless otherwise noted. Anhydrous solvent were purchased from J&K® and used as received. Reactions were monitored by TLC on silica gel plates (GF254), and the analytical thin-layer chromatography (TLC) was performed on precoated, glass-backed silica gel plates. <sup>1</sup>H NMR, <sup>13</sup>C NMR spectra were recorded on a Bruker AVANCE III-400 spectrometer at room temperature. Chemical shifts (δ) are reported in ppm downfield from tetramethylsilane. Abbreviations for signal couplings are: s, singlet; d, doublet; t, triplet; m, multiplet. High resolution mass spectras were obtained on a high-resolution mass spectrometer in the ESI mode. N-(pyrimidin-2-yl)-1H-indoles were prepared according to literature procedures<sup>1</sup>. All other reagents were purchased from commercial sources and used

---

<sup>1</sup> N. Sauer mann, M. J. Gonzalez, L. Ackermann, *Org. Lett.* **2015**, *17*, 5316–5319.

as received.

## 2. General procedure

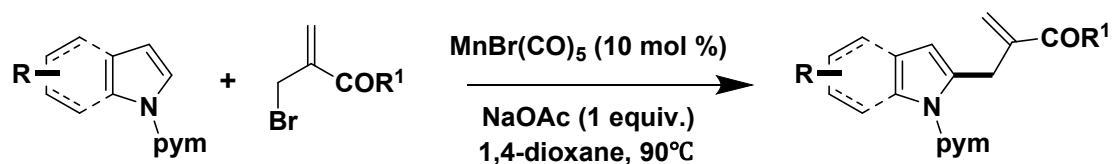

An oven-dried Schlenk tube (10 mL) was equipped with a magnetic stir bar, **1a** (0.1 mmol), **2a** (2 equiv, 0.2 mmol),  $\text{MnBr(CO)}_5$  (10 mol %, 0.01 mmol, 2.7 mg) and NaOAc (1.0 equiv, 0.1 mmol, 8.7 mg). 1.0 ml 1,4-dioxane was added with syringe under air and the reaction mixture was stirred at 90 °C and monitored by TLC. After the reaction was finished, the mixture was concentrated under vacuum to remove 1,4-dioxane, and the residue was purified by chromatography on silica gel to afford the product.

## 3. Extensive substrate test

More substrates with structures other than DG-protected indoles and ethyl 2-(bromomethyl) acrylate were tested under the standard conditions, but most of them fail to deliver the corresponding products.

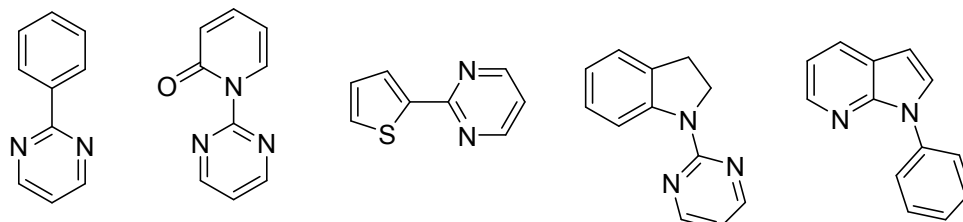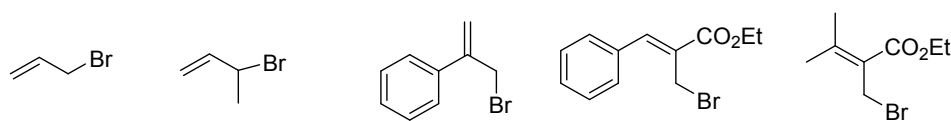

## 4. Gram-scale test

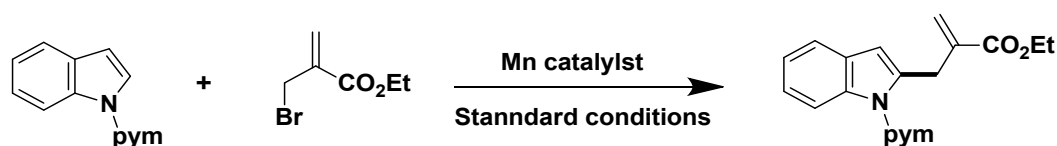

**1a** (10 mmol, 1.95 g) **2a** (20 mmol, 3.82 g)

**3a** (1.90 g, 62%)

An oven-dried flask (250 mL) was equipped with a magnetic stir bar, **1a** (10.0 mmol),

**2a** (2 equiv, 20.0 mmol),  $\text{MnBr}(\text{CO})_5$  (10 mol %, 1.0 mmol) and  $\text{NaOAc}$  (1.0 equiv, 10.0 mmol). 100 ml 1,4-dioxane was added with syringe under air and the reaction mixture was stirred at 90 °C and monitored by TLC. After the reaction was finished, the mixture was concentrated under vacuum to remove 1,4-dioxane, and the residue was purified by chromatography on silica gel to afford the product.

## 5. Mechanism studies

### (a) H/D exchange experiment

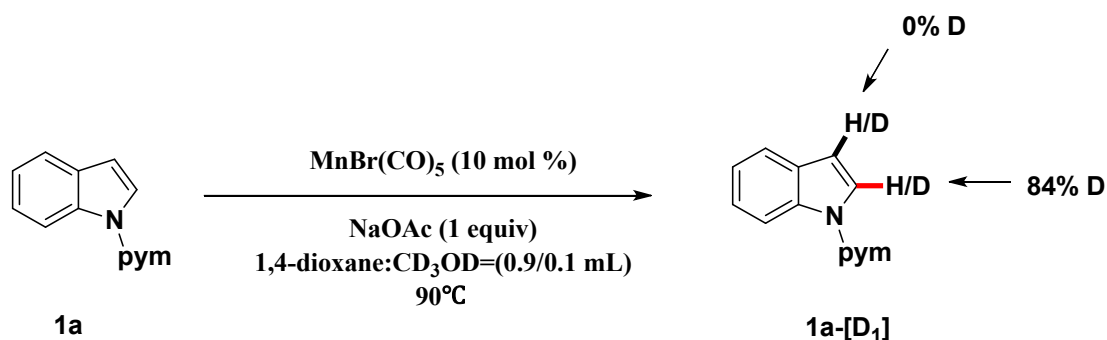

An oven-dried Schlenk tube (10 mL) was equipped with a magnetic stir bar, **1a** (0.1 mmol),  $\text{MnBr}(\text{CO})_5$  (10 mol %, 0.01 mmol, 2.7 mg) and  $\text{NaOAc}$  (1.0 equiv, 0.1 mmol, 8.7 mg). 0.9 mL 1,4-dioxane, 0.1 mL  $\text{CD}_3\text{OD}$  was added with syringe under Ar and the mixture was stirred at 90 °C overnight. After the reaction was finished, the mixture was filtered and concentrated under vacuum to remove the solvent, and the residue collected without further purification.

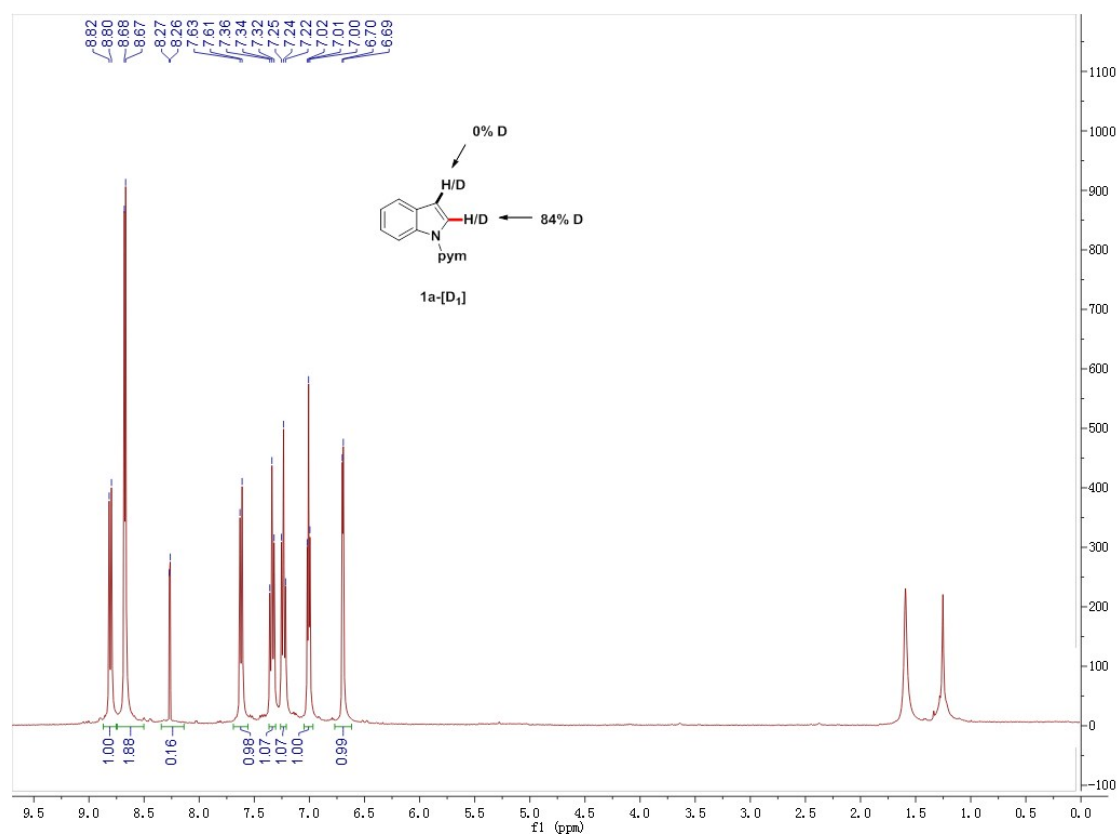

### (b) KIE experiment

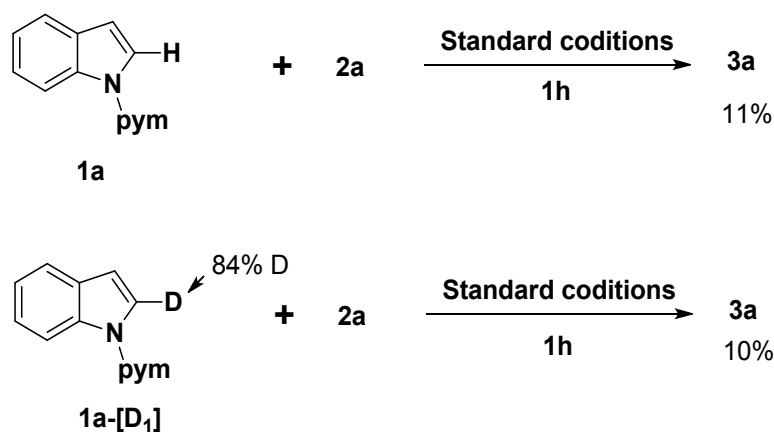

Two oven-dried Schlenk tube (10 mL) were added with **1a** (0.1 mmol) and **1a-[D<sub>1</sub>]** (0.1 mmol), respectively, and were both added with **2a** (2 equiv, 0.2 mmol), MnBr(CO)<sub>5</sub> (10 mol %, 0.01 mmol, 2.7 mg) and NaOAc (1.0 equiv, 0.1 mmol, 8.7 mg). 1.0 ml 1,4-dioxane under air. The reaction mixture was stirred at 90 °C for 1 hour. After the reaction was finished, the mixture was concentrated under vacuum to remove 1,4-dioxane, and the residue was purified by chromatography on silica gel to afford **3a**. Yield of **3a** is 10% for **1a** and 11% for **1a-[D<sub>1</sub>]** ( $K_{\text{H}}/K_{\text{D}} = 1.1$ ).

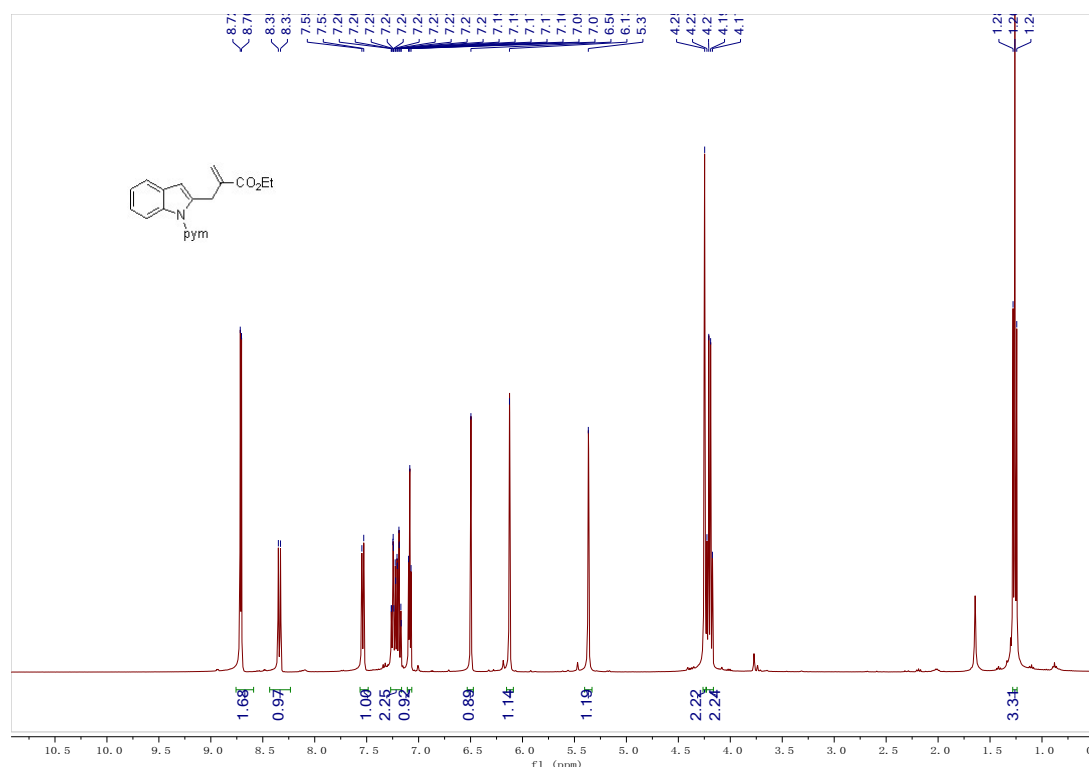

### (c) Preparation of complex **4**

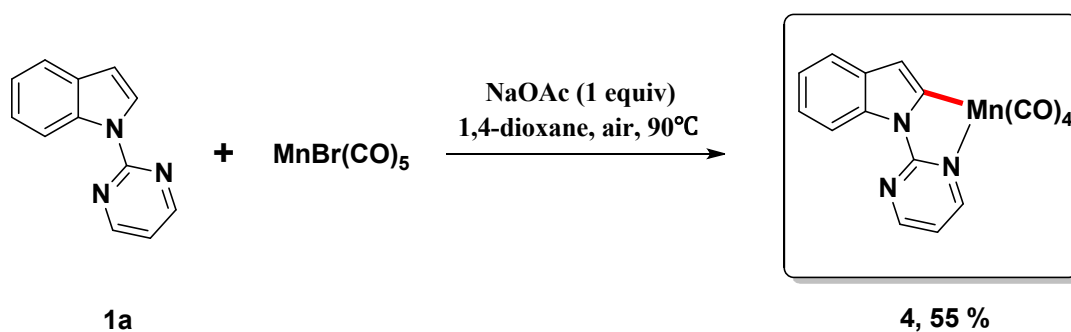

An oven-dried Schlenk tube (10 mL) was equipped with a magnetic stir bar, **1a** (0.1 mmol),  $\text{MnBr}(\text{CO})_5$  (1.0 equiv, 0.1 mmol) and NaOAc (1.0 equiv, 0.1 mmol). 1.0 ml 1,4-dioxane was added with syringe under air and the reaction mixture was stirred at 90 °C. After the reaction was finished, the mixture was concentrated under vacuum to remove 1,4-dioxane, and the residue was purified by chromatography on silica gel to afford **4**.

$^1\text{H}$  NMR (400 MHz, Chloroform-*d*)  $\delta$  = 8.73 (dd,  $J$  = 4.8, 2.4 Hz, 1H), 8.62 (dd,  $J$  = 5.6, 2.4 Hz, 1H), 8.52 (d,  $J$  = 8.0 Hz, 1H), 7.44 (d,  $J$  = 7.5 Hz, 1H), 7.20 (dd,  $J$  = 7.5, 7.3 Hz, 1H), 7.12 (dd,  $J$  = 7.5, 7.2, 1H), 6.90 (t,  $J$  = 5.2 Hz, 1H), 6.79 (s, 1H). NMR data is in accordance with the previous literature<sup>2</sup>.

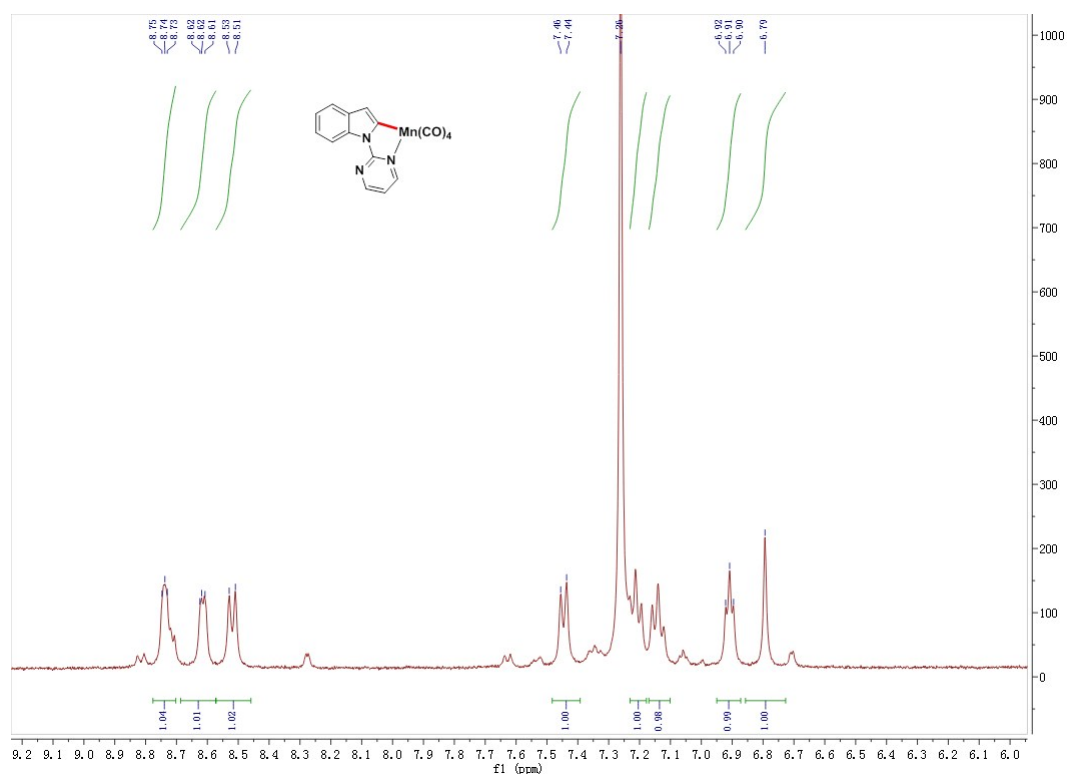

**(d) 4 as catalyst**

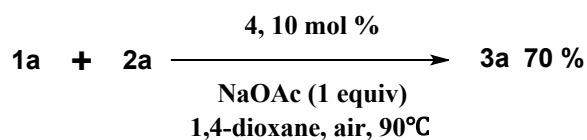

An oven-dried Schlenk tube (10 mL) was equipped with a magnetic stir bar, **1a** (0.1 mmol), **2a** (2 equiv, 0.2 mmol), **4** (10 mol %, 0.01 mmol, 2.7 mg) and NaOAc (1.0 equiv, 0.1 mmol, 8.7 mg). 1.0 ml 1,4-dioxane was added with syringe under air and the reaction mixture was stirred at 90 °C and monitored by TLC. After the reaction was finished, the mixture was concentrated under vacuum to remove 1,4-dioxane, and the residue was purified by chromatography on silica gel to afford **3a**.

**(e) stoichiometric addition with complex 4**

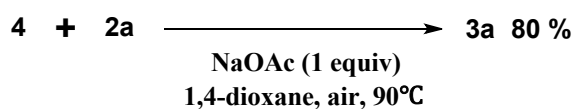

An oven-dried Schlenk tube (10 mL) was equipped with a magnetic stir bar, **4** (0.1

<sup>2</sup> Z. Ruan, N. Sauermann, E. Manoni and L. Ackermann, *Angew. Chem. Int. Ed.*, 2017, **56**, 3172.

mmol), **2a** (2 equiv, 0.2 mmol) and NaOAc (1.0 equiv, 0.1 mmol, 8.7 mg). 1.0 ml 1,4-dioxane was added with syringe under air and the reaction mixture was stirred at 90 °C and monitored by TLC. After the reaction was finished, the mixture was concentrated under vacuum to remove 1,4-dioxane, and the residue was purified by chromatography on silica gel to afford **3a**.

#### (f) Radical scavenger experiments

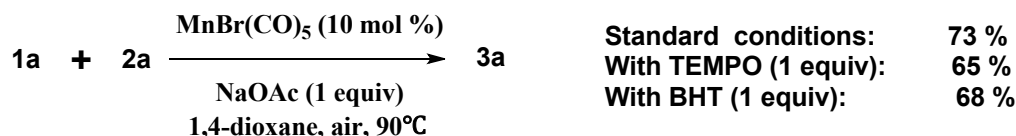

An oven-dried Schlenk tube (10 mL) was equipped with a magnetic stir bar, **1a** (0.1 mmol), **2a** (2 equiv, 0.2 mmol), MnBr(CO)<sub>5</sub> (10 mol %, 0.01 mmol, 2.7 mg) and NaOAc (1.0 equiv, 0.1 mmol, 8.7 mg), Radical scavenger (1.0 equiv, 0.1 mmol), 1.0 ml 1,4-dioxane was added with syringe under air and the reaction mixture was stirred at 90 °C and monitored by TLC. After the reaction was finished, the mixture was concentrated under vacuum to remove 1,4-dioxane, and the residue was purified by chromatography on silica gel to afford the product.

## 6. Characterization data for new compounds

### Ethyl 2-((1-(pyrimidin-2-yl)-1H-indol-2-yl) methyl) acrylate **3a**

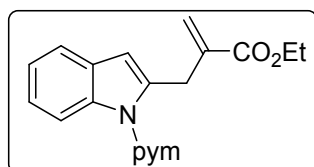

The reaction was carried out according to the general procedure (16 h). The residue was purified by flash column chromatography (9:1 petroleum ether: ethyl acetate) to afford **3a** (22.4 mg, 73 % yield) as yellow liquid. <sup>1</sup>H NMR (400 MHz, Chloroform-*d*) δ 8.71(d, *J*=4.8 Hz, 2H), 8.34(d, *J*=8.4 Hz, 1H), 7.54(d, *J*=7.2 Hz, 1H), 7.17-7.26(m, 2H), 7.08(t, *J*=8.4 Hz, 1H), 6.50(s, 1H), 6.13(s, 1H), 5.37(s, 1H), 4.25(s, 2H), 4.20(q, *J*=7.2 Hz, 2 H), 1.26(t, *J*=7.2 Hz, 3H) <sup>13</sup>C NMR (100 MHz, Chloroform-*d*) δ 167.1, 167.0, 158.0, 139.1, 138.2, 137.1, 129.1, 125.6, 122.9, 121.9, 119.9, 117.0, 114.3, 108.0, 60.8, 31.8, 14.3. HRMS (ESI)



Calcd for  $[M+H]^+$ : 308.1394, found: 308.1397.

**Ethyl 2-((3-methyl-1-(pyrimidin-2-yl)-1H-indol-2-yl) methyl) acrylate **3b****

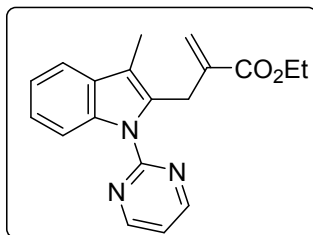

The reaction was carried out according to the general procedure (16 h). The residue was purified by flash column chromatography (10:1 petroleum ether: ethyl acetate) to afford **3b** (24.1mg, 75 % yield) as yellow liquid.  $^1\text{H}$  NMR (400 MHz, Chloroform-*d*)  $\delta$  8.66(d,  $J=8.4$  Hz, 2H), 8.32-8.35(m, 1H), 7.53-7.55(m, 1H), 7.21-7.28(m, 2H), 7.02(t,  $J=4.8$  Hz, 1H), 6.03(s, 1H), 5.12(s, 1H), 4.12(s, 2H), 4.23(q,  $J=7.2$  Hz, 2H), 2.29(s, 3H), 1.30(t,  $J=7.2$  Hz, 3H).  $^{13}\text{C}$  NMR (100 MHz, Chloroform-*d*)  $\delta$  167.1, 158.0, 138.9, 136.2, 133.0, 130.3, 124.48, 123.2, 121.6, 118.2, 115.1, 60.7, 28.3, 14.3, 8.8. HRMS (ESI) Calcd for  $[M+Na]^+$ : 344.1369, found: 344.1372.

**Ethyl 2-((4-fluoro-1-(pyrimidin-2-yl)-1H-indol-2-yl)methyl)acrylate **3c****

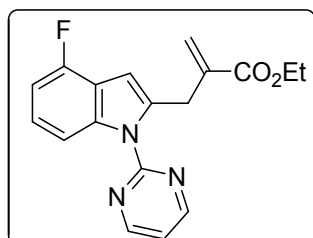

The reaction was carried out according to the general procedure (16 h). The residue was purified by flash column chromatography (10:1 petroleum ether: ethyl acetate) to afford **3c** (23.0 mg, 71 % yield) as yellow liquid.  $^1\text{H}$  NMR (400 MHz, Chloroform-*d*)  $\delta$  8.72(d,  $J=4.8$  Hz, 2H), 8.32-8.24(m, 2H), 7.92(dd,  $J_1=8.8$  Hz,  $J_2=2.0$  Hz, 1H), 7.13(t,  $J=4.8$  Hz, 1H), 6.54(s, 1H), 6.13(s, 1H), 5.37(d,  $J=1.4$  Hz, 2H), 4.23(s, 2H), 4.18(q,  $J=7.2$  Hz, 2H), 1.24(t,  $J=7.2$  Hz, 3H).  $^{13}\text{C}$  NMR (100 MHz, Chloroform-*d*)  $\delta$  169.9, 157.5, 156.5(d,  $J=220.6$  Hz), 140.0, 138.8, 133.4, 129.8(d,  $J=10.0$  Hz), 125.6, 117.0, 115.5(d,  $J=10.0$  Hz), 110.3, 107.6(d,  $J=4.0$  Hz), 105.1, 104.9, 60.7, 32.0, 14.2. HRMS (ESI) Calcd for  $[M+H]^+$ : 326.1299, found: 326.1297.

**Ethyl 2-((4-methyl-1-(pyrimidin-2-yl)-1H-indol-2-yl)methyl)acrylate **3d****

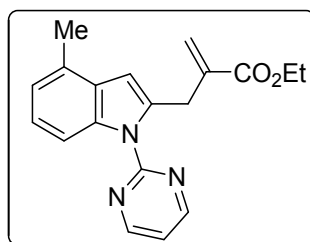

The reaction was carried out according to the general procedure (16 h). The residue was purified by flash column chromatography (10:1 petroleum ether: ethyl acetate) to afford **3d** (24.1 mg, 75 % yield) as yellow liquid. <sup>1</sup>H NMR (400 MHz, Chloroform-*d*) δ 8.72(d, *J*=4.8 Hz, 2H), 7.93(d, *J*=8.4 Hz, 1H), 7.17(t, *J*=8.4 Hz, 1H), 7.09(t, *J*=4.8 Hz, 1H), 6.65(d, *J*=7.9 Hz, 1H), 6.63(s, 1H), 6.13(s, 1H), 5.37(s, 1H), 4.23(s, 2H), 4.20(q, *J*=7.2 Hz, 2H), 2.59(s, 3H), 1.27(t, *J*=7.2 Hz, 3H). <sup>13</sup>C NMR (100 MHz, Chloroform-*d*) δ 169.9, 157.9, 151.4, 139.0, 138.4, 136.6, 128.4, 127.3, 125.5, 123.5, 119.7, 117.0, 107.8, 105.0, 69.9, 31.6, 21.4, 14.2. HRMS (ESI) Calcd for [M+H]<sup>+</sup>: 322.1550, found: 322.1554.

**Ethyl 2-((4-methoxy-1-(pyrimidin-2-yl)-1H-indol-2-yl) methyl) acrylate 3e**

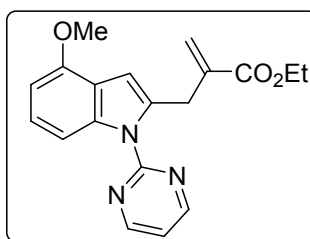

The reaction was carried out according to the general procedure (16 h). The residue was purified by flash column chromatography (10:1 petroleum ether: ethyl acetate) to afford **3e** (25.2 mg, 75 % yield) as yellow liquid. <sup>1</sup>H NMR (400 MHz, Chloroform-*d*) δ 8.71(d, *J*=4.8 Hz, 2H), 7.93(d, *J*=8.4 Hz, 1H), 7.16(t, *J*=8.0 Hz, 1H), 7.08(t, *J*=4.8 Hz, 1H), 6.62-6.65(m, 2H), 6.12(s, 1H), 5.36(s, 1H), 4.22(s, 2H), 4.19(q, *J*=7.2 Hz, 2H), 3.95(s, 3H), 1.26(t, *J*=7.2 Hz, 3H). <sup>13</sup>C NMR (101 MHz, CDCl<sub>3</sub>) δ 167.0, 158.0, 152.4, 139.1, 138.4, 136.7, 125.6, 123.6, 119.2, 117.1, 107.6, 104.8, 102.2, 60.7, 55.4, 31.7, 14.3. HRMS (ESI) Calcd for [M+H]<sup>+</sup>: 337.1426, found: 337.1430.

**Ethyl 2-((4-(benzyloxy)-1-(pyrimidin-2-yl)-1H-indol-2-yl) methyl) acrylate 3f**

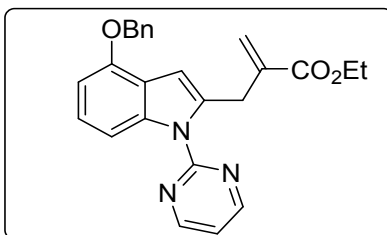

The reaction was carried out according to the general procedure (16 h). The residue was purified by flash column chromatography (10:1 petroleum ether: ethyl acetate) to afford **3f** (34.2 mg, 83 % yield) as yellow liquid. <sup>1</sup>H NMR (400 MHz, Chloroform-*d*) δ 8.68(d, *J*=4.8 Hz, 2H), 7.94(d, *J*=8.4 Hz, 1H), 7.48-7.50(m, 2H), 7.36-7.40(m, 2H), 7.31-7.33(m, 1H), 7.14(t, *J*=8.0 Hz, 1H), 7.05(t, *J*=4.8 Hz, 1H), 6.68-6.70(m, 2H), 6.11(s, 1H), 5.35(s, 1H), 5.21(s, 2H), 4.23(s, 2H), 4.19(q, *J*=6.8 Hz, 2H), 1.25(t, *J*=6.8 Hz, 3H). <sup>13</sup>C NMR (100 MHz, Chloroform-*d*) δ 167.0, 158.0, 151.6, 139.2, 138.5, 137.5, 136.7, 128.5, 127.8, 125.6, 123.6, 119.9, 117.1, 107.9, 105.2, 103.8, 70.1, 60.7, 31.7, 14.3. HRMS (ESI) Calcd for [M+H]<sup>+</sup>: 413.1739, found: 413.1740.

**Methyl 2-(2-(ethoxycarbonyl) allyl)-1-(pyrimidin-2-yl)-1H-indole-4-carboxylate **3g****

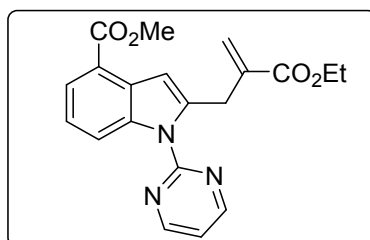

The reaction was carried out according to the general procedure (16 h). The residue was purified by flash column chromatography (6:1 petroleum ether: ethyl acetate) to afford **3g** (26.6 mg, 73 % yield) as faint yellow liquid. <sup>1</sup>H NMR (400 MHz, Chloroform-*d*) δ 8.74(d, *J*=4.8 Hz, 2H), 8.31(d, *J*=8.8 Hz, 1H), 8.27(d, *J*=1.6 Hz, 1H), 7.94(dd, *J*<sub>1</sub>=8.8 Hz, *J*<sub>2</sub>=2.0 Hz, 1H), 7.14(t, *J*=4.8 Hz, 1H), 6.56(s, 1H), 6.15(s, 1H), 5.38(s, 1H), 4.24(s, 2H), 4.19(q, *J*=7.2 Hz, 2H), 3.93(s, 3H), 1.25(t, *J*=7.2 Hz, 3H). <sup>13</sup>C NMR (100 MHz, Chloroform-*d*) δ 167.8, 166.8, 158.1, 157.7, 139.9, 139.6, 138.7, 128.7, 125.9, 124.2, 123.7, 122.4, 117.7, 113.9, 108.2, 60.8, 51.9, 31.8, 14.2. HRMS (ESI) Calcd for [M+H]<sup>+</sup>: 365.1376, found: 365.1378.

**Ethyl 2-((5-methyl-1-(pyrimidin-2-yl)-1H-indol-2-yl) methyl) acrylate **3h****

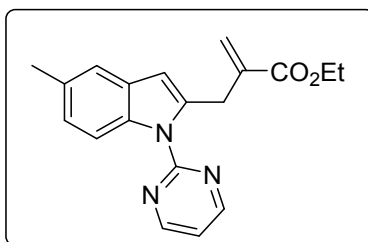

The reaction was carried out according to the general procedure (16 h). The residue was purified by flash column chromatography (9:1 petroleum ether: ethyl acetate) to afford **3h** (27.2 mg, 85 % yield) as yellow liquid. <sup>1</sup>H NMR (400 MHz, Chloroform-*d*) δ 8.66(d, *J*=4.8 Hz, 2H), 8.25(d, *J*=8.8 Hz, 1H), 7.31(s, 1H), 7.06(dd, *J*<sub>1</sub>=8.4 Hz, *J*<sub>2</sub>=1.6 Hz, 1H), 7.02(t, *J*=4.8 Hz, 1H), 6.41(s, 1H), 6.11(s, 1H), 5.34(s, 1H), 4.22(s, 2H), 4.19(q, *J*=6.8 Hz, 2H), 2.43(s, 3H), 1.25(t, *J*=6.8 Hz, 3H). <sup>13</sup>C NMR (100 MHz, Chloroform-*d*) δ 167.1, 157.9, 139.3, 138.3, 135.4, 131.3, 129.4, 125.4, 124.3, 119.8, 114.3, 107.9, 60.7, 32.0, 21.4, 14.3. HRMS (ESI) Calcd for [M+Na]<sup>+</sup>: 344.1369, found: 344.1372.

**Ethyl 2-((5-methoxy-1-(pyrimidin-2-yl)-1H-indol-2-yl) methyl) acrylate 3i**

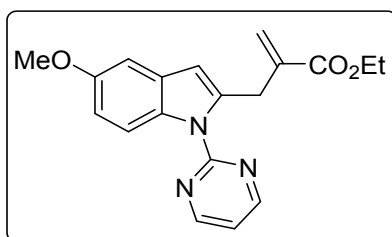

The reaction was carried out according to the general procedure (16 h). The residue was purified by flash column chromatography (9:1 petroleum ether: ethyl acetate) to afford **3i** (26.9 mg, 80 % yield) as yellow liquid. <sup>1</sup>H NMR (400 MHz, Chloroform-*d*) δ 8.67(d, *J*=4.8 Hz, 2H), 8.31(d, *J*=9.2 Hz, 1H), 7.04(t, *J*=4.8 Hz, 1H), 7.01(d, *J*=2.4 Hz, 1H), 6.87(dd, *J*<sub>1</sub>=9.2 Hz, *J*<sub>2</sub>=2.8 Hz, 1H), 6.42(s, 1H), 6.12(s, 1H), 5.36(s, 1H), 4.24(s, 2H), 4.20(q, *J*=7.2 Hz, 2H), 3.86(s, 3H), 1.26(t, *J*=7.2 Hz, 3H). <sup>13</sup>C NMR (100 MHz, Chloroform-*d*) δ 167.0, 157.9, 155.4, 139.2, 131.9, 129.9, 125.5, 116.7, 115.6, 111.8, 108.1, 102.3, 60.7, 55.7, 32.1, 14.3. HRMS (ESI) Calcd for [M+H]<sup>+</sup>: 337.1426, found: 337.1432.

**Ethyl 2-((5-fluoro-1-(pyrimidin-2-yl)-1H-indol-2-yl) methyl) acrylate 3j**

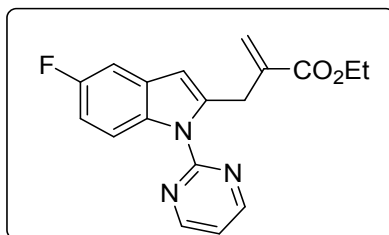

The reaction was carried out according to the general procedure (16 h). The residue was purified by flash column chromatography (9:1 petroleum ether: ethyl acetate) to afford **3j** (22.4 mg, 69 % yield) as yellow liquid. <sup>1</sup>H NMR (400 MHz, Chloroform-*d*) δ 8.70(d, *J*=4.8 Hz, 2H), 8.31(dd, *J*=4.8 Hz, 1H), 7.17(dd, *J*<sub>1</sub>=8.8 Hz, *J*<sub>2</sub>=2.8 Hz, 1H), 7.09(t, *J*=4.8 Hz, 1H), 6.93-6.98(m, 1H), 6.44(s, 1H), 6.14(s, 1H), 5.37(s, 1H), 4.24(s, 2H), 4.20(q, *J*=7.2 Hz, 2H), 1.26 (t, *J*=7.2 Hz, 3H). <sup>13</sup>C NMR (100 MHz, Chloroform-*d*) δ 166.9, 159.0(d, *J*=220.6 Hz), 158.0, 157.8, 140.1, 138.9, 133.4, 129.9(d, *J*=10.1 Hz), 125.7, 117.1, 115.5(d, *J*= 9.0 Hz), 107.7(d, *J*=4.0 Hz), 105.2, 104.9, 60.8, 32.1, 14.2. HRMS (ESI) Calcd for [M+H]<sup>+</sup>: 325.1227, found: 325.1230.

**Ethyl 2-((5-chloro-1-(pyrimidin-2-yl)-1H-indol-2-yl) methyl) acrylate **3k****

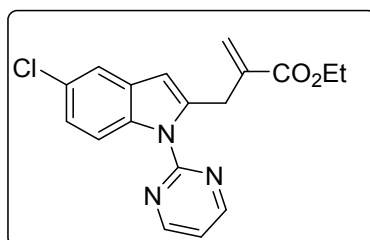

The reaction was carried out according to the general procedure (16 h). The residue was purified by flash column chromatography (9:1 petroleum ether: ethyl acetate) to afford **3k** (25.5 mg, 75 % yield) as yellow liquid. <sup>1</sup>H NMR (400 MHz, Chloroform-*d*) δ 8.69(d, *J*=4.8 Hz, 2H), 8.27(d, *J*=8.8 Hz, 1H), 7.48(d, *J*=2.0 Hz, 1H), 7.17(dd, *J*<sub>1</sub>=8.8 Hz, *J*<sub>2</sub>=2.0 Hz, 1H), 7.09(t, *J*=4.8 Hz, 1H), 6.41(s, 1H), 6.14(s, 1H), 5.36(s, 1H), 4.23(s, 2H), 4.20(q, *J*=7.2 Hz, 2H), 1.25(t, *J*=7.2 Hz, 3H). <sup>13</sup>C NMR (100 MHz, Chloroform-*d*) δ 166.9, 158.0, 139.9, 138.8, 135.4, 130.3, 127.4, 125.8, 122.9, 119.3, 117.3, 115.7, 107.2, 60.8, 32.0, 14.3. HRMS (ESI) Calcd for [M+Na]<sup>+</sup>: 341.0931, found: 341.0930.

**Ethyl 2-((5-bromo-1-(pyrimidin-2-yl)-1H-indol-2-yl) methyl) acrylate **3l****

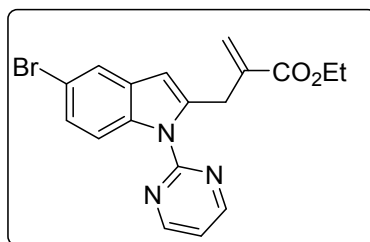

The reaction was carried out according to the general procedure (16 h). The residue was purified by flash column chromatography (9:1 petroleum ether: ethyl acetate) to afford **3l** (25.0 mg, 65 % yield) as yellow liquid. <sup>1</sup>H NMR (400 MHz, Chloroform-*d*) δ 8.72(d, *J*=4.8 Hz, 2H), 8.23(d, *J*=9.2 Hz, 1H), 7.65(d, *J*=2.0 Hz, 1H), 7.31(dd, *J*<sub>1</sub>=10.8 Hz, *J*<sub>2</sub>=2.0 Hz, 1H), 7.12(t, *J*=4.8 Hz, 1H), 6.42(s, 1H), 6.14(s, 1H), 6.37(s, 1. H), 4.22(s, 2H), 4.20(q, *J*=7.2 Hz, 2H), 1.26(t, *J*=7.2 Hz, 3H). <sup>13</sup>C NMR (100 MHz, Chloroform-*d*) δ 166.8, 158.1, 139.7, 138.8, 135.7, 130.9, 125.6, 122.4, 117.3, 116.0, 115.1, 107.1, 60.8, 31.9, 14.2. HRMS (ESI) Calcd for [M+Na]<sup>+</sup>: 385.0426, found: 385.0430.

**Ethyl 2-((5-cyano-1-(pyrimidin-2-yl)-1H-indol-2-yl) methyl) acrylate 3m**

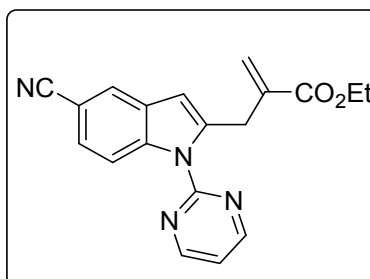

The reaction was carried out according to the general procedure (16 h). The residue was purified by flash column chromatography (10:1 petroleum ether: ethyl acetate) to afford **3m** (14.3 mg, 43 % yield) as colorless liquid. <sup>1</sup>H NMR (400 MHz, Chloroform-*d*) δ 8.79(d, *J*=4.8 Hz, 2H), 8.36(d, *J*=8.4 Hz, 1H), 7.87(s, 1H), 7.47(dd, *J*<sub>1</sub>=1.6 Hz, *J*<sub>2</sub>=8.8 Hz, 1H), 7.23(t, *J*=4.8 Hz, 1H), 6.54(s, 1H), 6.17(s, 1H), 5.40(s, 1H), 4.25(s, 2H), 4.20(q, *J*=7.2 Hz, 2H), 1.26(t, *J*=7.2 Hz, 3H). <sup>13</sup>C NMR (100 MHz, Chloroform-*d*) δ 166.6, 158.3, 157.5, 141.1, 138.8, 138.4, 128.9, 125.9, 124.9, 120.4, 118.1, 115.1, 107.3, 105.0, 60.9, 31.8, 14.2. HRMS (ESI) Calcd for [M+Na]<sup>+</sup>: 332.1273, found: 332.1281.

**Ethyl 2-((5-formyl-1-(pyrimidin-2-yl)-1H-indol-2-yl)methyl)acrylate 3n**

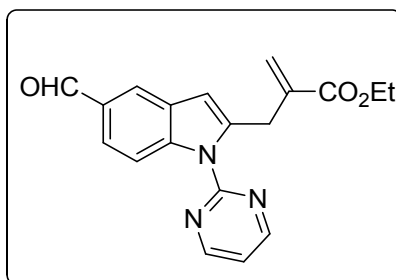

The reaction was carried out according to the general procedure (16 h). The residue was purified by flash column chromatography (10:1 petroleum ether: ethyl acetate) to afford **3n** (13.8 mg, 41 % yield) as yellow liquid. <sup>1</sup>H NMR (400 MHz, Chloroform-*d*) δ 9.88(s, 1H), 8.70(d, *J*=4.8 Hz, 2H), 8.28(d, *J*=8.8 Hz, 1H), 7.49(d, *J*=2.0 Hz, 1H), 7.18(dd, *J*<sub>1</sub>=8.8 Hz, *J*<sub>2</sub>=2.0 Hz, 1H), 7.12-7.07(m, 1H), 6.42(s, 1H), 6.15(s, 1H), 5.37(s, 1H), 4.24(s, 2H), 4.20(q, *J*=7.2 Hz, 2H), 1.26(t, *J*=7.2 Hz, 3H). <sup>13</sup>C NMR (100 MHz, Chloroform-*d*) δ 190.6, 166.6, 158.2, 157.4, 142.6, 138.3, 135.8, 132.3, 126.1, 124.9, 120.7, 120.5, 117.8, 107.8, 105.3, 60.9, 32.1, 14.2. HRMS (ESI) Calcd for [M+H]<sup>+</sup>: 336.1343, found: 336.1347.

#### Ethyl 2-((6-methyl-1-(pyrimidin-2-yl)-1H-indol-2-yl) methyl) acrylate **3o**

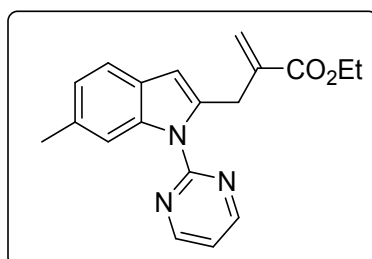

The reaction was carried out according to the general procedure (16 h). The residue was purified by flash column chromatography (9:1 petroleum ether: ethyl acetate) to afford **3o** (22.4 mg, 70 % yield) as yellow liquid. <sup>1</sup>H NMR (400 MHz, Chloroform-*d*) δ 8.70(d, *J*=4.8 Hz, 2H), 8.14(s, 1H), 7.41(d, *J*=8.0 Hz, 1H), 7.06(t, *J*=4.8 Hz, 1H), 7.01-7.03(m, 1H), 6.44(s, 1H), 6.10(s, 1H), 5.34(s, 1H), 4.21(s, 2H), 4.19(q, *J*=6.8 Hz, 2H), 2.48(s, 3H), 1.25(t, *J*=7.2 Hz, 3H). <sup>13</sup>C NMR (100 MHz, Chloroform-*d*) δ 167.0, 158.0, 139.3, 137.4, 132.7, 126.9, 125.4, 123.4, 119.5, 116.9, 114.3, 107.9, 60.7, 31.8, 22.1, 14.3. HRMS (ESI) Calcd for [M+Na]<sup>+</sup>: 344.1369, found: 344.1370.

#### Ethyl 2-((6-fluoro-1-(pyrimidin-2-yl)-1H-indol-2-yl) methyl) acrylate **3p**

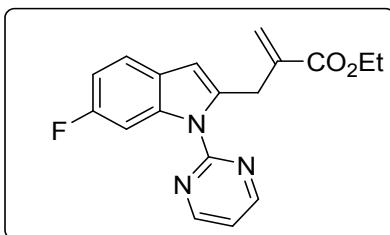

The reaction was carried out according to the general procedure (16 h). The residue was purified by flash column chromatography (9:1 petroleum ether: ethyl acetate) to afford **3p** (21.1 mg, 65 % yield) as yellow liquid. <sup>1</sup>H NMR (400 MHz, Chloroform-*d*) δ 8.71(d, *J*=4.8 Hz, 2H), 8.15(dd, *J*<sub>1</sub>=7.2 Hz, *J*<sub>2</sub>=2.4 Hz, 1H), 7.42(dd, *J*<sub>1</sub>=8.8 Hz, *J*<sub>2</sub>=5.6 Hz, 1H), 7.09(t, *J*=4.8 Hz, 1H), 6.93-6.98(m, 1H), 6.45(s, 1H), 6.13(s, 1H), 5.36(s, 1H), 4.23(s, 2H), 4.20(q, *J*=7.2 Hz, 2H), 1.26(t, *J*=7.2 Hz, 3H). <sup>13</sup>C NMR (100 MHz, Chloroform-*d*) δ 166.9, 160.5 (d, *J*=235.6 Hz), 158.0, 157.9, 139.1, 138.8(d, *J*=3.8 Hz), 137.1 (d, *J*=12.8 Hz), 125.6, 125.4, 120.2 (d, *J*=9.8 Hz), 117.2, 110.1(d, *J*=19.6 Hz), 107.7, 101.9(d, *J*=28.7 Hz), 60.8, 32.0, 14.2. HRMS (ESI) Calcd for [M+H]<sup>+</sup>: 325.1227, found: 325.1230.

**Ethyl 2-((6-chloro-1-(pyrimidin-2-yl)-1H-indol-2-yl) methyl) acrylate **3q****

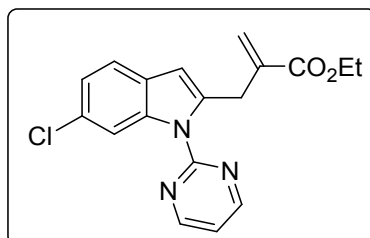

The reaction was carried out according to the general procedure (16 h). The residue was purified by flash column chromatography (9:1 petroleum ether: ethyl acetate) to afford **3q** (25.5 mg, 75 % yield) as yellow liquid. <sup>1</sup>H NMR (400 MHz, Chloroform-*d*) δ 8.72(d, *J*=4.8 Hz, 2H), 8.40(d, *J*=1.6 Hz, 1H), 7.42(d, *J*=8.4 Hz, 1H), 7.16(dd, *J*<sub>1</sub>=8.4 Hz, *J*<sub>2</sub>=2.0 Hz, 1H), 7.12(t, *J*=4.8 Hz, 1H), 6.45(s, 1H), 6.13(s, 1H), 5.37(s, 1H), 4.23(s, 2H), 4.20(q, *J*=7.2 Hz, 2H), 1.26(t, *J*=7.2 Hz, 3H). <sup>13</sup>C NMR (100 MHz, Chloroform-*d*) δ 166.9, 158.1, 157.8, 138.9, 137.3, 128.7, 127.6, 125.7, 122.4, 120.5, 117.3, 11.7, 107.7, 60.8, 32.0, 14.2. HRMS (ESI) Calcd for [M+Na]<sup>+</sup>: 341.0931, found: 341.0928.

**Ethyl 2-((6-bromo-1-(pyrimidin-2-yl)-1H-indol-2-yl) methyl) acrylate **3r****



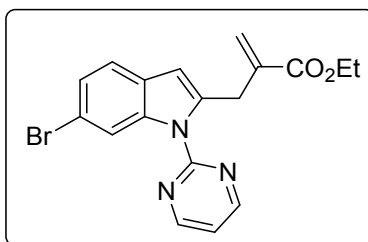

The reaction was carried out according to the general procedure (16 h). The residue was purified by flash column chromatography (9:1 petroleum ether: ethyl acetate) to afford **3r** (23.1 mg, 60 % yield) as faint yellow liquid. <sup>1</sup>H NMR (400 MHz, Chloroform-*d*) δ 8.72(d, *J*=4.8 Hz, 2H), 8.55(d, *J*=1.2 Hz, 1H), 7.38(d, *J*=8.0 Hz, 1H), 7.30(dd, *J*<sub>1</sub>=8.4 Hz, *J*<sub>2</sub>=1.6 Hz, 1H), 7.12(t, *J*=4.8 Hz, 1H), 6.45(s, 1H), 6.13(s, 1H), 5.36(s, 1H), 4.22(s, 2H), 4.19(q, *J*=7.2 Hz, 3H), 1.25(t, *J*=7.2 Hz, 3H). <sup>13</sup>C NMR (100 MHz, Chloroform-*d*) δ 166.9, 158.1, 157.8, 138.8, 137.7, 128.0, 125.7, 125.1, 121.0, 117.4, 116.5, 107.7, 60.8, 31.9, 14.2. HRMS (ESI) Calcd for [M+Na]<sup>+</sup>: 385.0426, found: 385.0420.

**Ethyl 2-((6-cyano-1-(pyrimidin-2-yl)-1H-indol-2-yl) methyl) acrylate 3s**

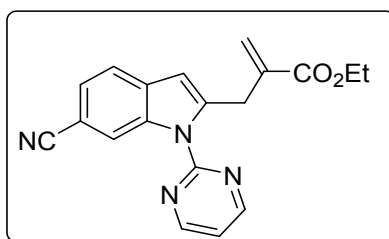

The reaction was carried out according to the general procedure (16 h). The residue was purified by flash column chromatography (9:1 petroleum ether: ethyl acetate) to afford **3s** (13.2 mg, 40 % yield) as colorless liquid. <sup>1</sup>H NMR (400 MHz, Chloroform-*d*) δ 8.78(d, *J*=4.8 Hz, 2H), 8.76(s, 1H), 7.58(d, *J*=8.0 Hz, 1H), 7.43(dd, *J*<sub>1</sub>=8.0 Hz, *J*<sub>2</sub>=1.2 Hz, 1H), 7.22(t, *J*=4.8 Hz, 1H), 6.54(s, 1H), 6.19(s, 1H), 5.41(s, 1H), 4.29(s, 2H), 4.20(q, *J*=7.2 Hz, 2H), 1.26(t, *J*=7.2 Hz, 3H). <sup>13</sup>C NMR (100 MHz, Chloroform-*d*) δ 166.7, 158.3, 157.5, 142.7, 138.4, 135.9, 132.4, 126.2, 125.0, 120.8, 120.5, 119.5, 117.9, 107.9, 105.4, 60.9, 32.1, 14.2. HRMS (ESI) Calcd for [M+Na]<sup>+</sup>: 332.1273, found: 332.1280.

**Ethyl 2-((6-methoxy-1-(pyrimidin-2-yl)-1H-indol-2-yl)methyl)acrylate 3t**

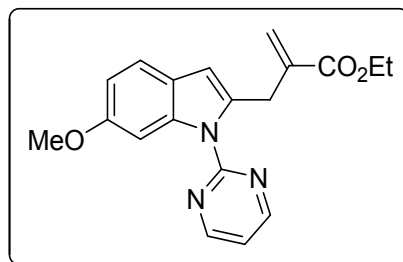

The reaction was carried out according to the general procedure (16 h). The residue was purified by flash column chromatography (9:1 petroleum ether: ethyl acetate) to afford **3t** (23.0 mg, 68 % yield) as yellow liquid.  $^1\text{H}$  NMR (400 MHz, Chloroform-*d*)  $\delta$  8.69(d,  $J=4.8$  Hz, 2H), 8.10(s, 1H), 7.41(d,  $J=8.0$  Hz, 1H), 7.07(t,  $J=4.8$  Hz, 1H), 7.04(t,  $J=7.2$  Hz, 1H), 6.44(s, 1H), 6.10(s, 1H), 5.34(s, 1H), 4.21(s, 2H), 4.19(q,  $J=6.8$  Hz, 2H), 3.83(s, 3H), 1.27(t,  $J=7.2$  Hz, 3H).  $^{13}\text{C}$  NMR (100 MHz, Chloroform-*d*)  $\delta$  166.8, 158.0, 157.7, 138.8, 137.3, 128.7, 127.6, 125.6, 122.4, 120.5, 117.2, 114.6, 107.6, 60.5, 56.3, 31.9, 22.1, 14.2. HRMS (ESI) Calcd for  $[\text{M}+\text{H}]^+$ : 338.1499, found: 338.1496.

**Methyl 2-(2-(ethoxycarbonyl)allyl)-1-(pyrimidin-2-yl)-1H-indole-6-carboxylate 3u**

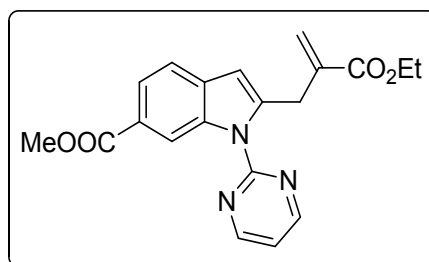

The reaction was carried out according to the general procedure (16 h). The residue was purified by flash column chromatography (9:1 petroleum ether: ethyl acetate) to afford **3u** (16.4 mg, 45 % yield) as yellow liquid.  $^1\text{H}$  NMR (400 MHz, Chloroform-*d*)  $\delta$  8.73(d,  $J=4.8$  Hz, 2H), 8.41(s, 1H), 7.43(d,  $J=8.0$  Hz, 1H), 7.19-7.15(m, 1H), 7.12(t,  $J=4.8$  Hz, 1H), 6.46(s, 1H), 6.14(s, 1H), 5.37(s, 1H), 4.25(s, 2H), 4.20(q,  $J=6.8$  Hz, 2H), 3.89(s, 3H), 1.26(t,  $J=7.2$  Hz, 3H).  $^{13}\text{C}$  NMR (100 MHz, Chloroform-*d*)  $\delta$  169.7, 166.9, 157.9, 139.1, 137.4, 137.3, 132.6, 126.8, 125.3, 123.3, 119.4, 116.8, 114.2, 107.8, 60.6, 50.9, 31.7, 14.2. HRMS (ESI) Calcd for  $[\text{M}+\text{Na}]^+$ : 366.1448, found: 366.1445.

**Ethyl 2-((7-methyl-1-(pyrimidin-2-yl)-1H-indol-2-yl) methyl) acrylate 3v**

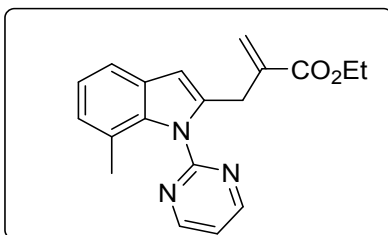

The reaction was carried out according to the general procedure (16 h). The residue was purified by flash column chromatography (9:1 petroleum ether: ethyl acetate) to afford **3v** (22.4 mg, 70 % yield) as yellow liquid.  $^1\text{H}$  NMR (400 MHz, Chloroform-*d*)  $\delta$  8.80(d,  $J=4.8$  Hz, 2H), 7.43(d,  $J=7.6$  Hz, 1H), 7.24(t,  $J=4.8$  Hz, 1H), 7.08(t,  $J=7.6$  Hz, 1H), 6.96(d,  $J=7.2$  Hz, 1H), 6.46(s, 1H), 6.08(s, 1H), 5.30(s, 1H), 4.15(q,  $J=7.2$  Hz, 2H), 3.84(s, 2H), 1.97(s, 3H), 1.24(t,  $J=7.2$  Hz, 3H).  $^{13}\text{C}$  NMR (100 MHz, Chloroform-*d*)  $\delta$  166.6, 158.6, 158.3, 138.3, 138.0, 136.6, 129.5, 126.3, 125.4, 122.0, 121.4, 119.0, 118.1, 105.7, 60.8, 29.7, 20.2, 14.2. HRMS (ESI) Calcd for  $[\text{M}+\text{Na}]^+$ : 344.1369, found: 344.1370.

**Ethyl 2-((7-bromo-1-(pyrimidin-2-yl)-1H-indol-2-yl)methyl)acrylate **3w****

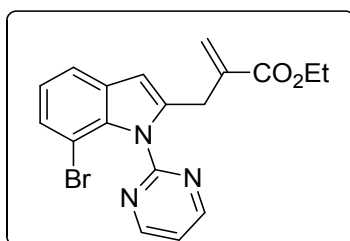

The reaction was carried out according to the general procedure (16 h). The residue was purified by flash column chromatography (9:1 petroleum ether: ethyl acetate) to afford **3w** (25.0 mg, 65 % yield) as yellow liquid.  $^1\text{H}$  NMR (400 MHz, Chloroform-*d*)  $\delta$  8.81(d,  $J=4.8$  Hz, 2H), 7.44(d,  $J=7.6$  Hz, 1H), 7.25(t,  $J=4.8$  Hz, 1H), 7.09(t,  $J=7.6$  Hz, 1H), 6.98(d,  $J=7.2$  Hz, 1H), 6.47(s, 1H), 6.09(s, 1H), 5.31(q,  $J=1.5$  Hz, 1H), 4.16(q,  $J=7.2$  Hz, 2H), 3.85(s, 2H), 1.24(t,  $J=7.2$  Hz, 3H).  $^{13}\text{C}$  NMR (100 MHz, Chloroform-*d*)  $\delta$  166.5, 158.5, 158.2, 138.2, 137.9, 136.6, 129.4, 126.2, 125.3, 121.9, 121.4, 118.9, 118.0, 105.6, 60.7, 30.1, 14.1. HRMS (ESI) Calcd for  $[\text{M}+\text{H}]^+$ : 386.0499, found: 386.0497.

**Ethyl 2-((7-chloro-1-(pyrimidin-2-yl)-1H-indol-2-yl)methyl)acrylate **3x****

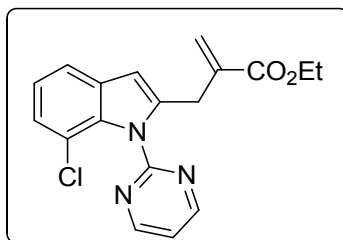

The reaction was carried out according to the general procedure (16 h). The residue was purified by flash column chromatography (9:1 petroleum ether: ethyl acetate) to afford **3x** (21.4 mg, 63 % yield) as yellow liquid.  $^1\text{H}$  NMR (400 MHz, Chloroform-*d*)  $\delta$  8.80(d,  $J=4.8$  Hz, 2H), 7.45(d,  $J=7.6$  Hz, 1H), 7.24(t,  $J=4.8$  Hz, 1H), 7.09(t,  $J=7.6$  Hz, 1H), 6.98(d,  $J=7.2$  Hz, 1H), 6.46(s, 1H), 6.08(s, 1H), 5.31(q,  $J=1.5$  Hz, 1H), 4.15(q,  $J=7.2$  Hz, 2H), 3.83(s, 2H), 1.24(t,  $J=7.2$  Hz, 3H).  $^{13}\text{C}$  NMR (100 MHz, Chloroform-*d*)  $\delta$  166.7, 158.7, 158.2, 138.3, 137.8, 136.8, 129.4, 126.2, 125.5, 121.9, 121.4, 118.8, 118.0, 105.6, 60.7, 29.9, 14.1. HRMS (ESI) Calcd for  $[\text{M}+\text{H}]^+$ : 342.1004, found: 342.1004.

**Ethyl 2-((5,6-dichloro-1-(pyrimidin-2-yl)-1H-indol-2-yl)methyl)acrylate **3y****

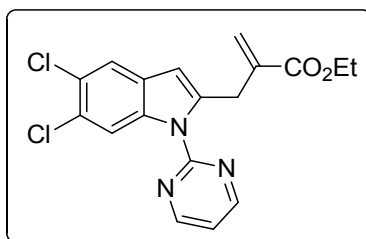

The reaction was carried out according to the general procedure (16 h). The residue was purified by flash column chromatography (9:1 petroleum ether: ethyl acetate) to afford **3y** (22.9 mg, 61 % yield) as yellow liquid.  $^1\text{H}$  NMR (400 MHz, Chloroform-*d*)  $\delta$  8.74(d,  $J=4.8$  Hz, 2H), 8.42(d,  $J=1.6$  Hz, 1H), 7.44(d,  $J=8.4$  Hz, 1H), 7.18(dd,  $J_1=8.4$  Hz,  $J_2=2.0$  Hz, 1H), 7.13(t,  $J=4.8$  Hz, 1H), 6.47(s, 1H), 6.15(s, 1H), 5.38(s, 1H), 4.24(s, 2H), 4.21(q,  $J=7.2$  Hz, 2H), 1.27(t,  $J=7.2$  Hz, 3H).  $^{13}\text{C}$  NMR (100 MHz, Chloroform-*d*)  $\delta$  166.7, 157.9, 139.8, 138.7, 135.3, 130.2, 127.3, 125.7, 122.8, 119.2, 117.2, 115.5, 107.1, 60.7, 31.9, 14.2. HRMS (ESI) Calcd for  $[\text{M}+\text{Na}]^+$ : 376.0614, found: 376.0617.

**Methyl 2-((1-(pyrimidin-2-yl)-1H-indol-2-yl) methyl) acrylate **3z****

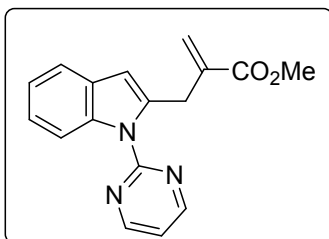

The reaction was carried out according to the general procedure (16 h). The residue was purified by flash column chromatography (10:1 petroleum ether: ethyl acetate) to afford **3z** (24.0 mg, 82 % yield) as colorless liquid. <sup>1</sup>H NMR (400 MHz, Chloroform-*d*) δ 8.70(d, *J*=4.8 Hz, 2H), 8.34(d, *J*=8.4 Hz, 1H), 7.53(d, *J*=7.2 Hz, 1H), 7.17-7.26(m, 2H), 7.07(t, *J*=4.8 Hz, 1H), 6.94(s, 1H), 6.13(s, 1H), 5.39(s, 1H), 4.25(s, 2H), 3.73(s, 3H). <sup>13</sup>C NMR (100 MHz, Chloroform-*d*) δ 167.5, 158.0, 138.8, 138.2, 137.1, 129.1, 123.0, 122.0, 120.0, 117.0, 114.4, 108.0, 52.0, 31.9. HRMS (ESI) Calcd for [M+Na]<sup>+</sup>: 316.1056, found: 316.1060.

**Ethyl 2-((4-oxo-1-(pyrimidin-2-yl)-4,5,6,7-tetrahydro-1H-indol-2-yl)methyl) acrylate**

**3aa**

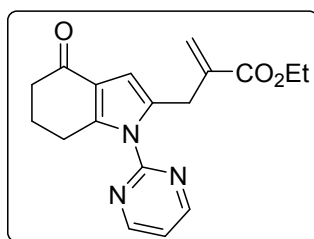

The reaction was carried out according to the general procedure (16 h). The residue was purified by flash column chromatography (9:1 petroleum ether: ethyl acetate) to afford **3aa** (21.1 mg, 65 % yield) as brown liquid. <sup>1</sup>H NMR (400 MHz, Chloroform-*d*) δ 8.77(d, *J*=4.8 Hz, 1H), 7.28(d, *J*=4.8 Hz, 1H), 6.46(s, 1H), 6.09(s, 1H), 5.35(s, 1H), 4.16(q, *J*=6.8 Hz, 2H), 3.91(s, 2H), 3.01(t, *J*=6.4 Hz, 2H), 2.50-2.53(m, 2H), 2.09-2.15(m, 2H), 1.26(t, *J*=6.8 Hz, 3H). <sup>13</sup>C NMR (100 MHz, Chloroform-*d*) δ 194.9, 166.6, 158.4, 156.9, 145.6, 138.5, 132.9, 125.8, 121.7, 119.0, 107.3, 60.8, 37.8, 30.1, 24.6, 23.9, 14.2. HRMS (ESI) Calcd for [M+Na]<sup>+</sup>: 348.1319, found: 348.1322.

**Ethyl 2-(benzo[h]quinolin-10-ylmethyl) acrylate 3bb**

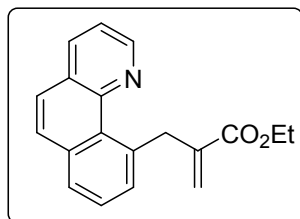

The reaction was carried out according to the general procedure (16 h). The residue was purified by flash column chromatography (15:1 petroleum ether: ethyl acetate) to afford **3bb** (14.5 mg, 50 % yield) as colorless liquid.  $^1\text{H}$  NMR (400 MHz, Chloroform- $d$ )  $\delta$  8.84(dd,  $J_1=4.4$  Hz,  $J_2=2.0$  Hz, 1H), 8.11(dd,  $J_1=8.0$  Hz,  $J_2=1.6$  Hz, 1H), 7.85(dd,  $J_1=8.4$  Hz,  $J_2=3.2$  Hz, 1H), 7.80(d,  $J=8.8$  Hz, 1H), 7.60-7.65(m, 2H), 7.54(dd,  $J_1=4.4$  Hz,  $J_2=0.8$  Hz, 1H), 7.43(dd,  $J_1=8.0$  Hz,  $J_2=4.4$  Hz, 1H), 5.95(s, 1H), 4.94(s, 1H), 4.81(s, 2H), 3.65(q,  $J=7.2$  Hz, 2H), 3.16 (t,  $J=7.2$  Hz, 2H).  $^{13}\text{C}$  NMR (100 MHz, Chloroform- $d$ )  $\delta$  168.3, 147.5, 147.1, 142.5, 138.5, 135.5, 135.4, 132.0, 129.2, 128.7, 127.8, 127.3, 125.7, 122.8, 120.8, 60.5, 39.7, 14.5. HRMS (ESI) Calcd for  $[\text{M}+\text{Na}]^+$ : 314.1151, found: 314.1150.

## 7. NMR Spectra for products

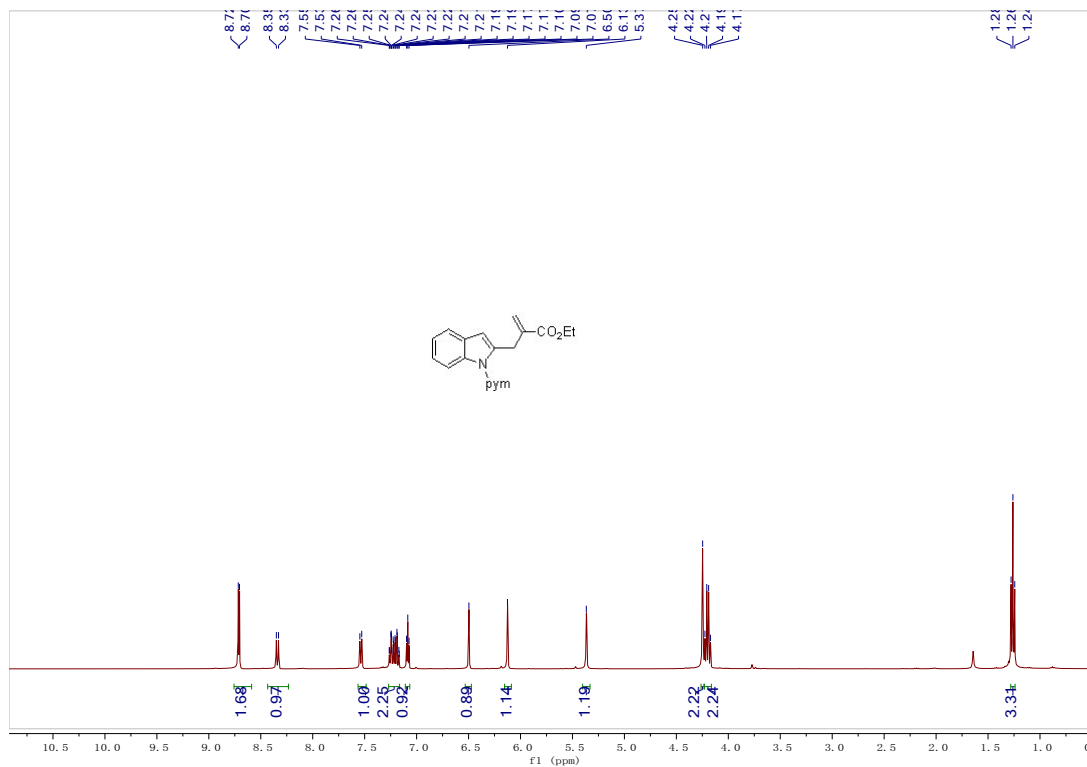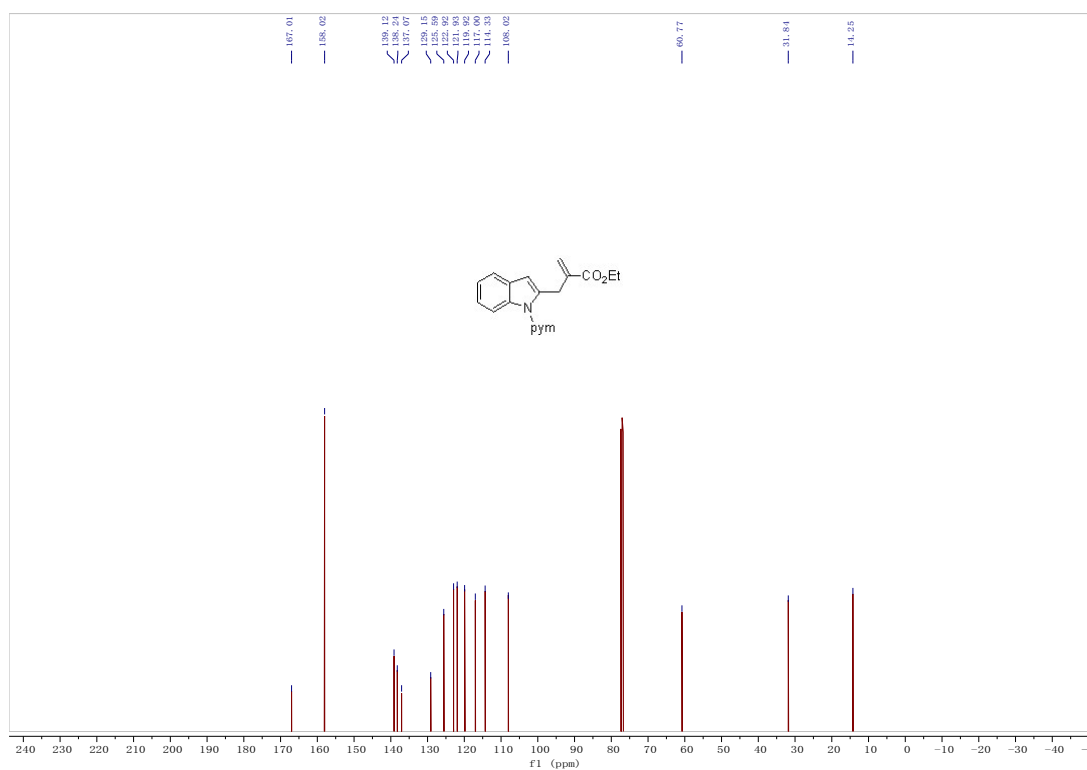

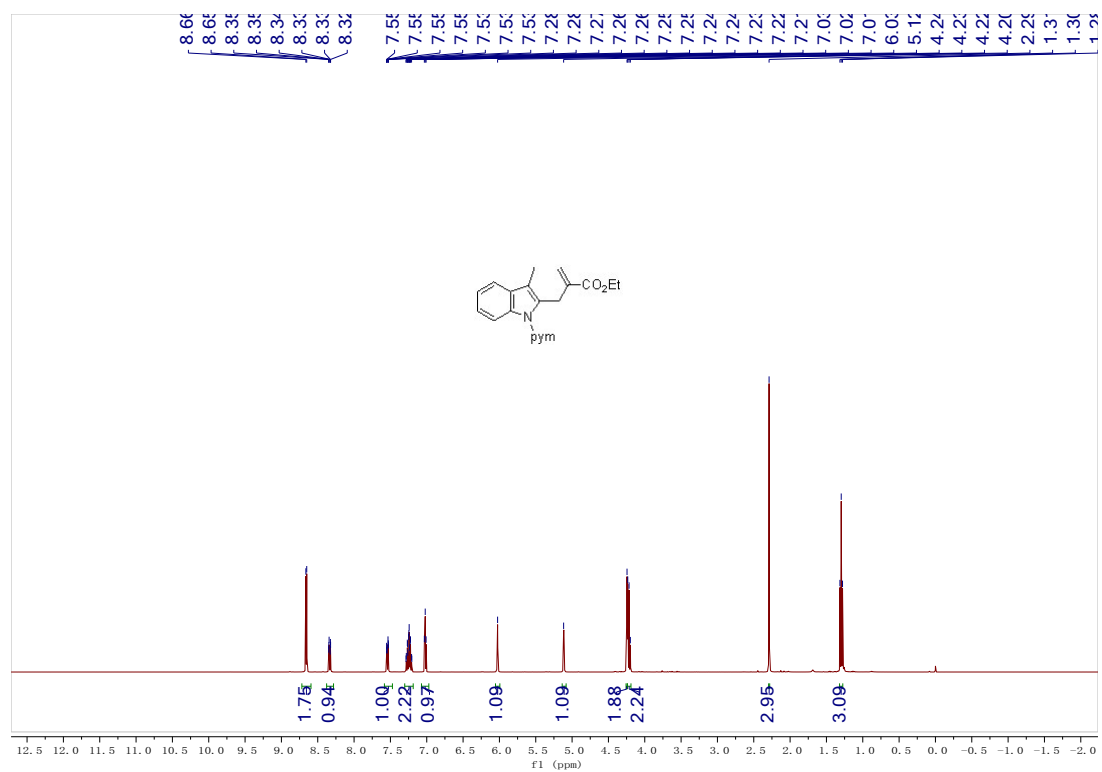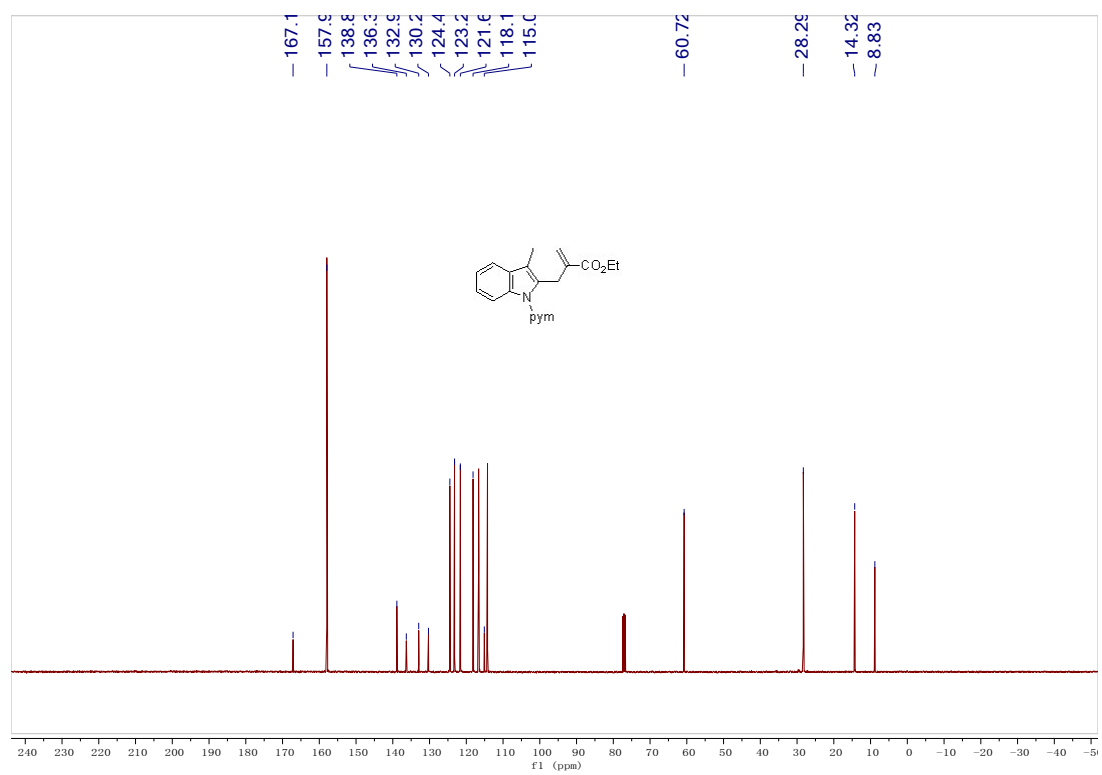



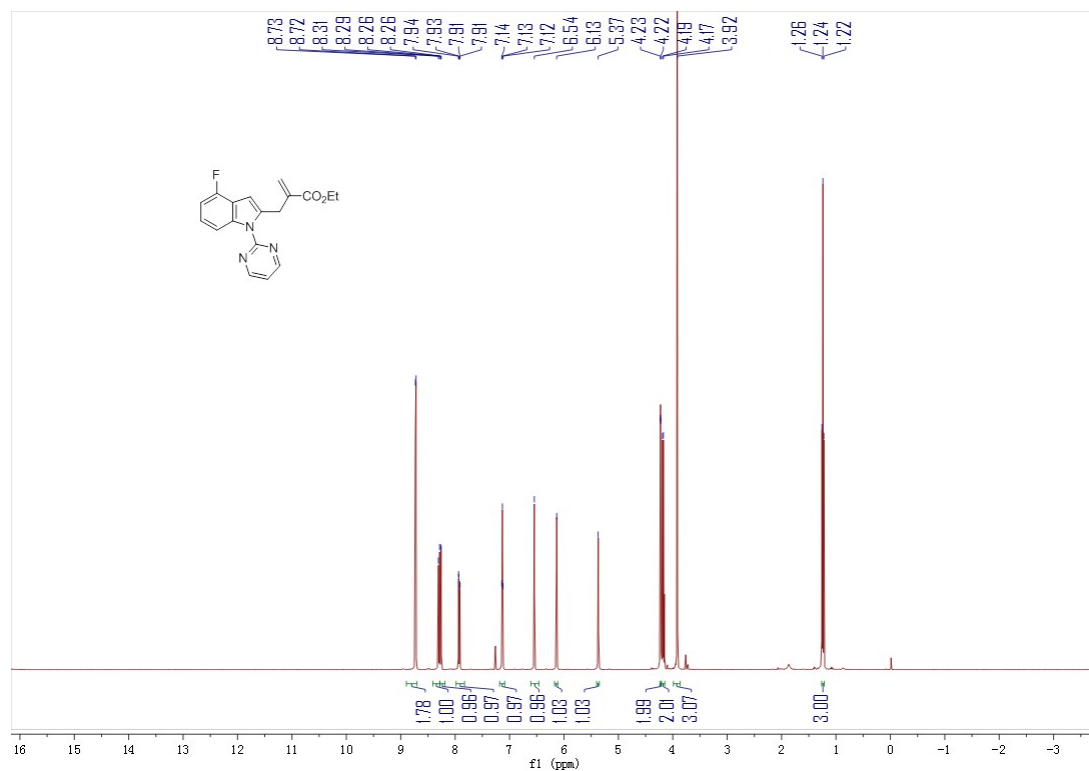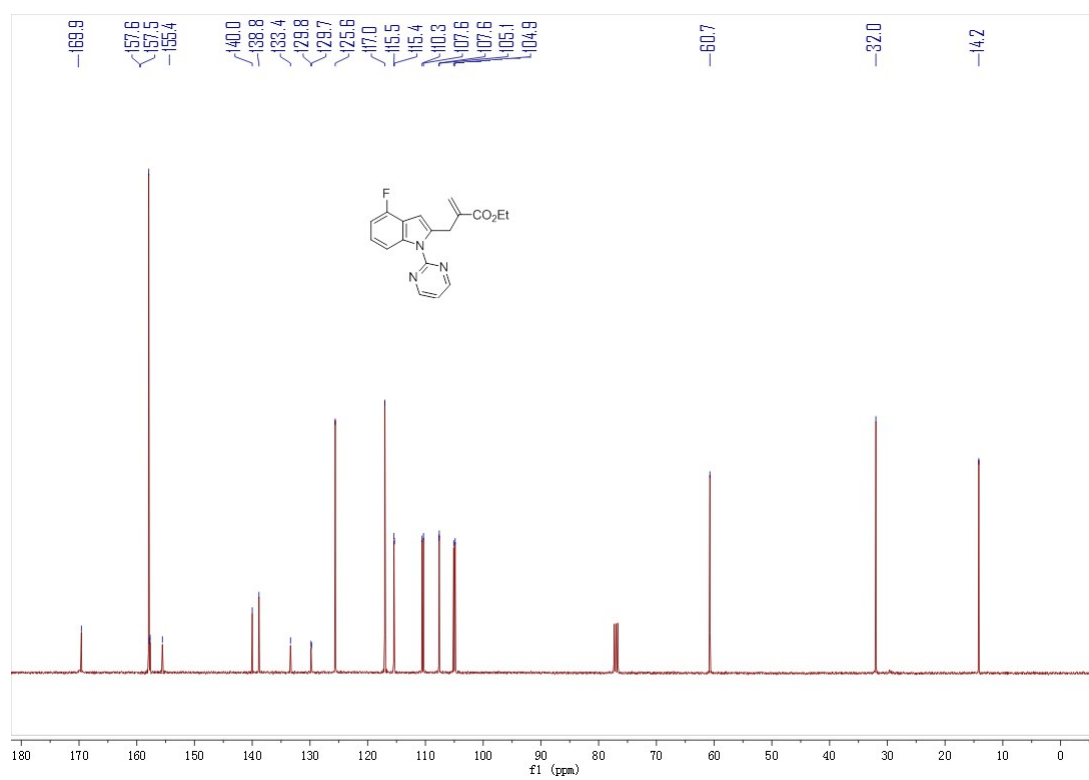

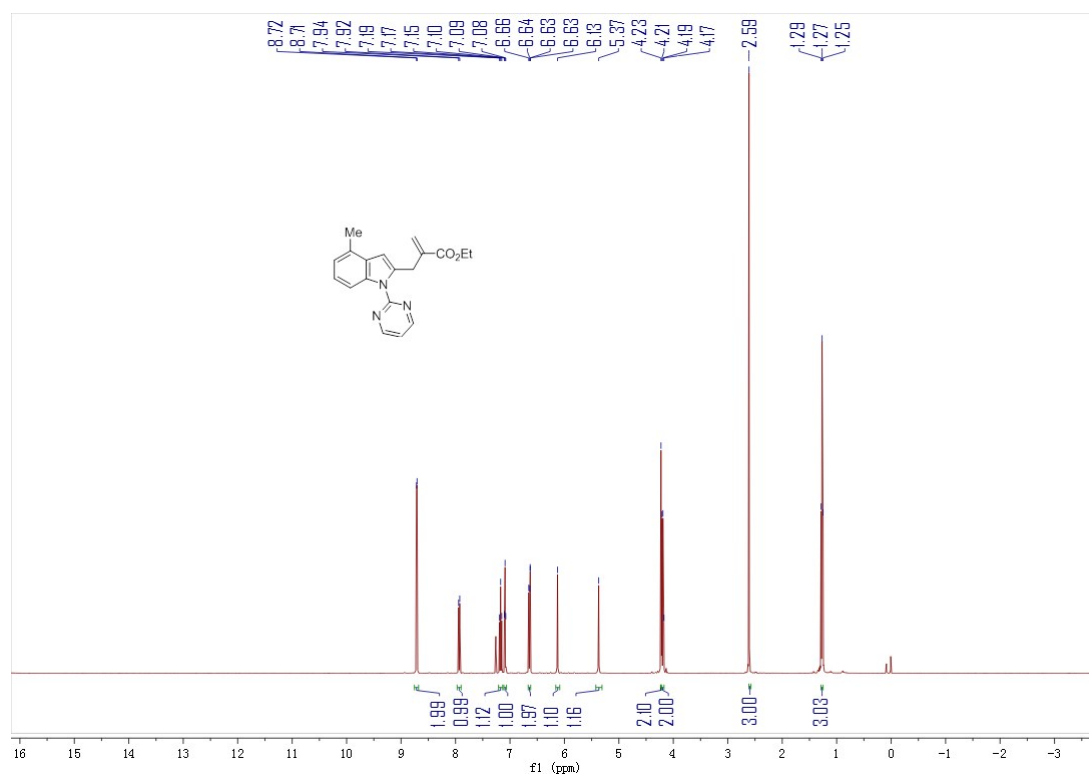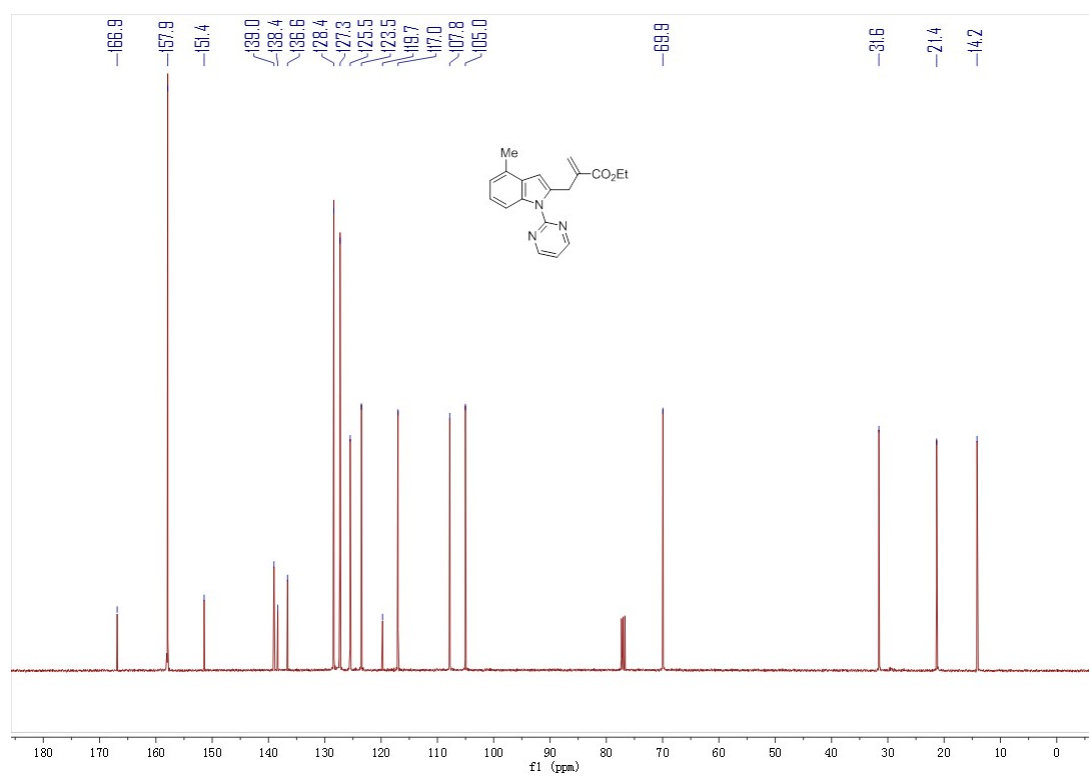

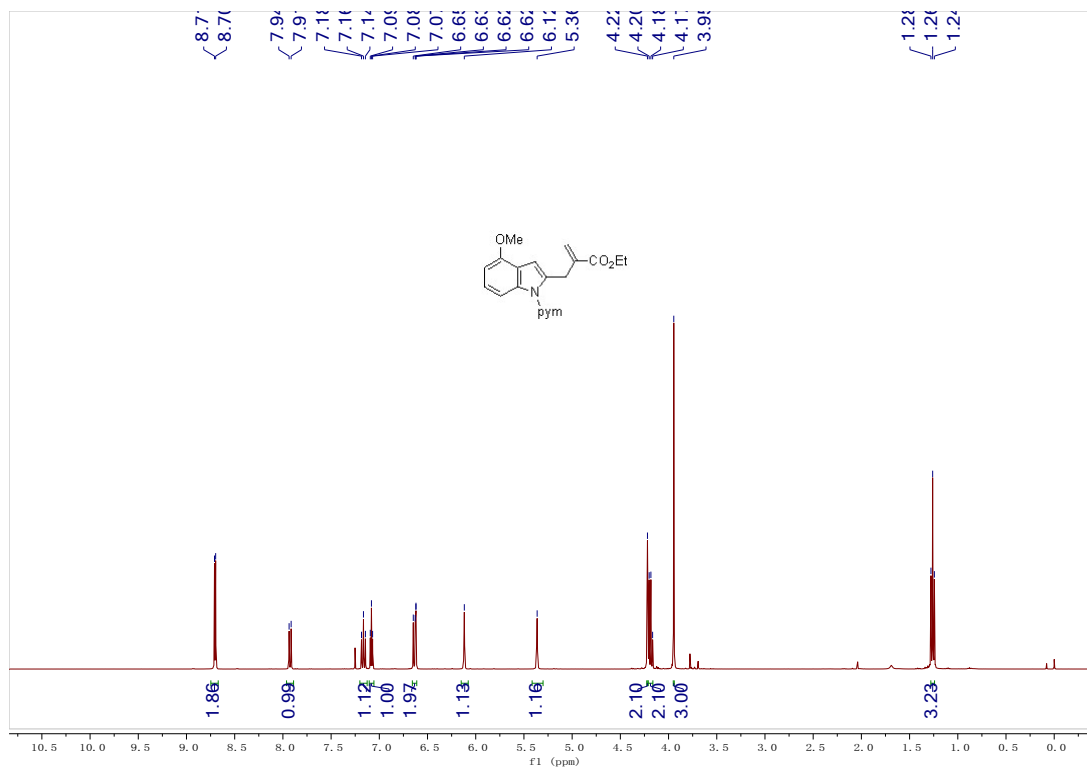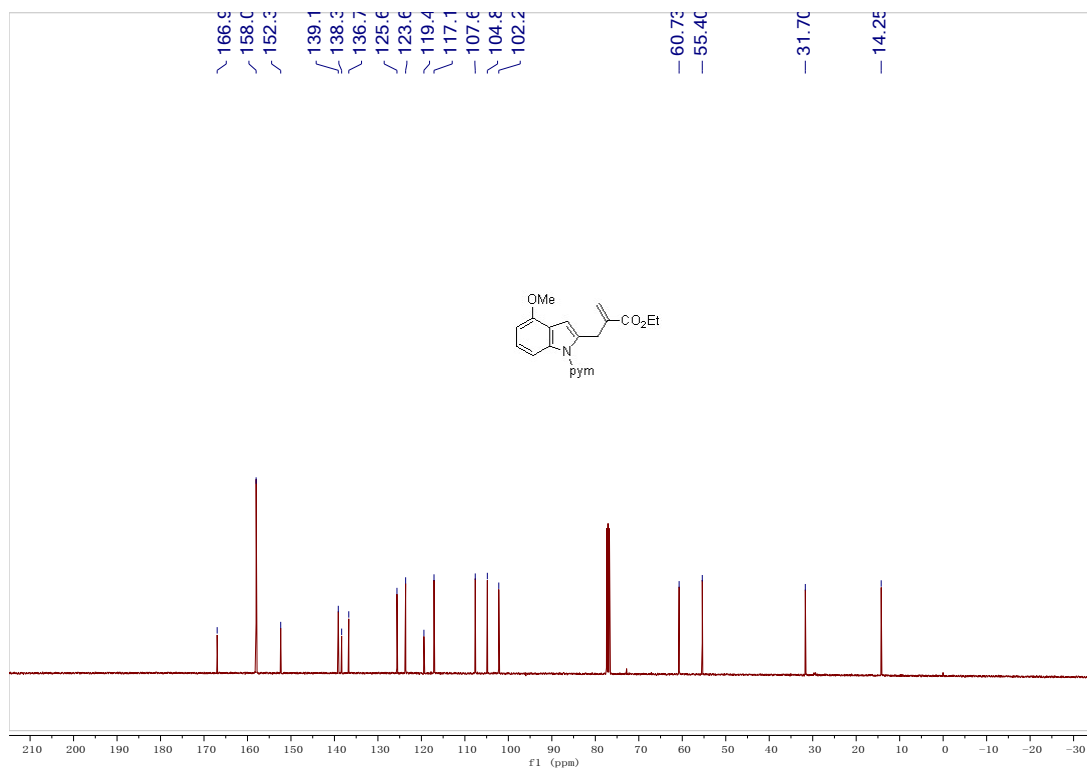

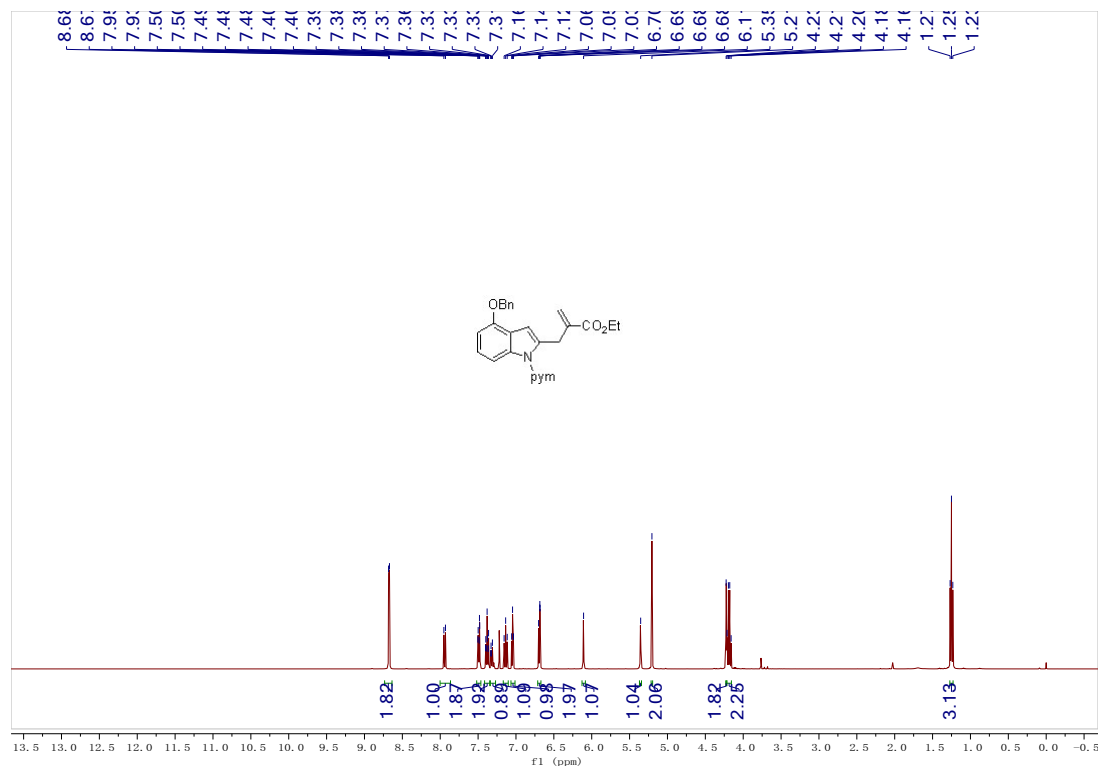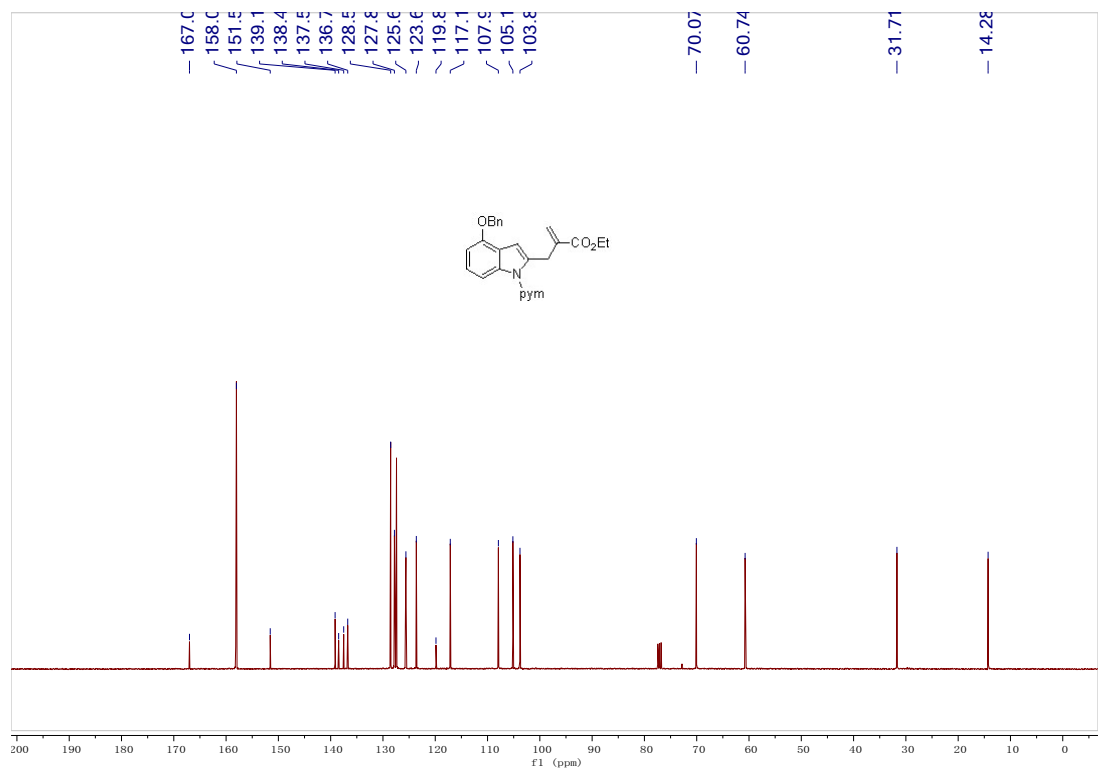

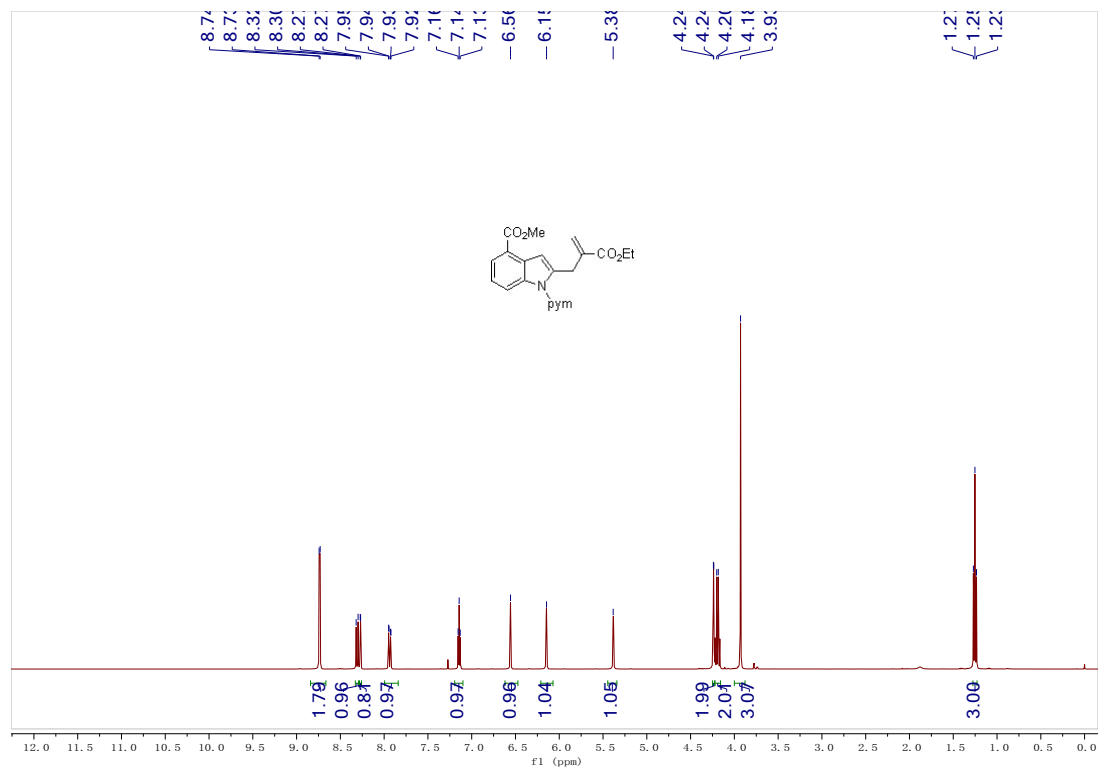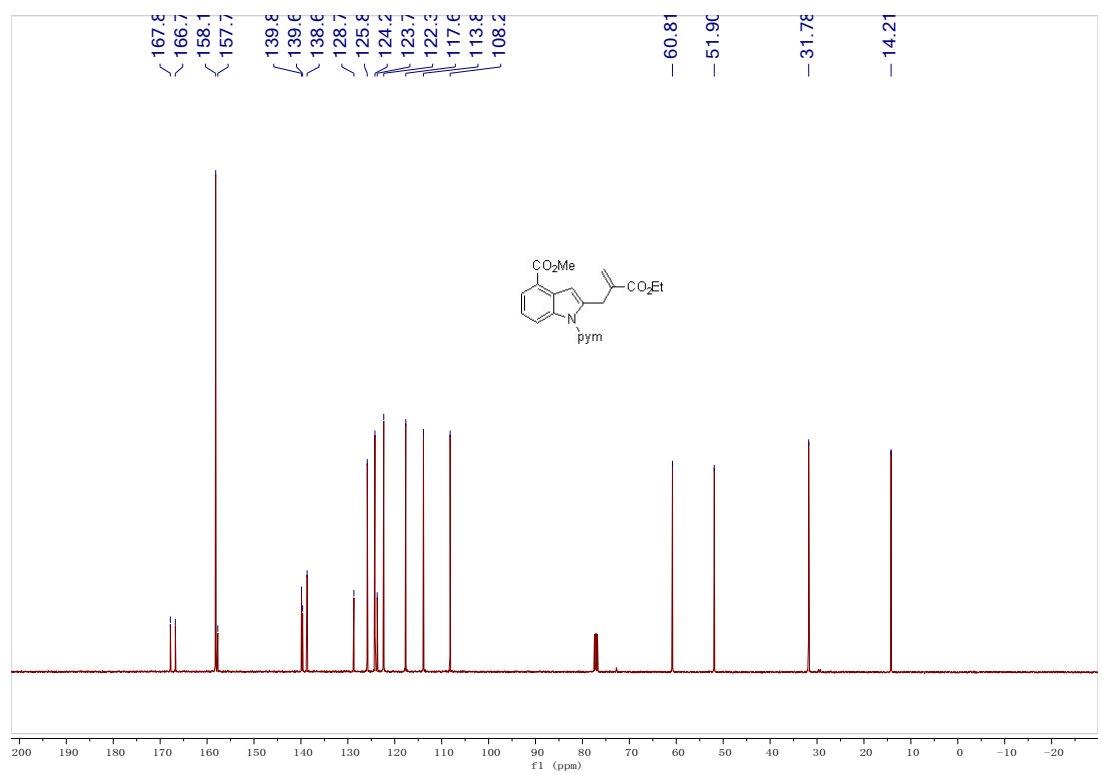

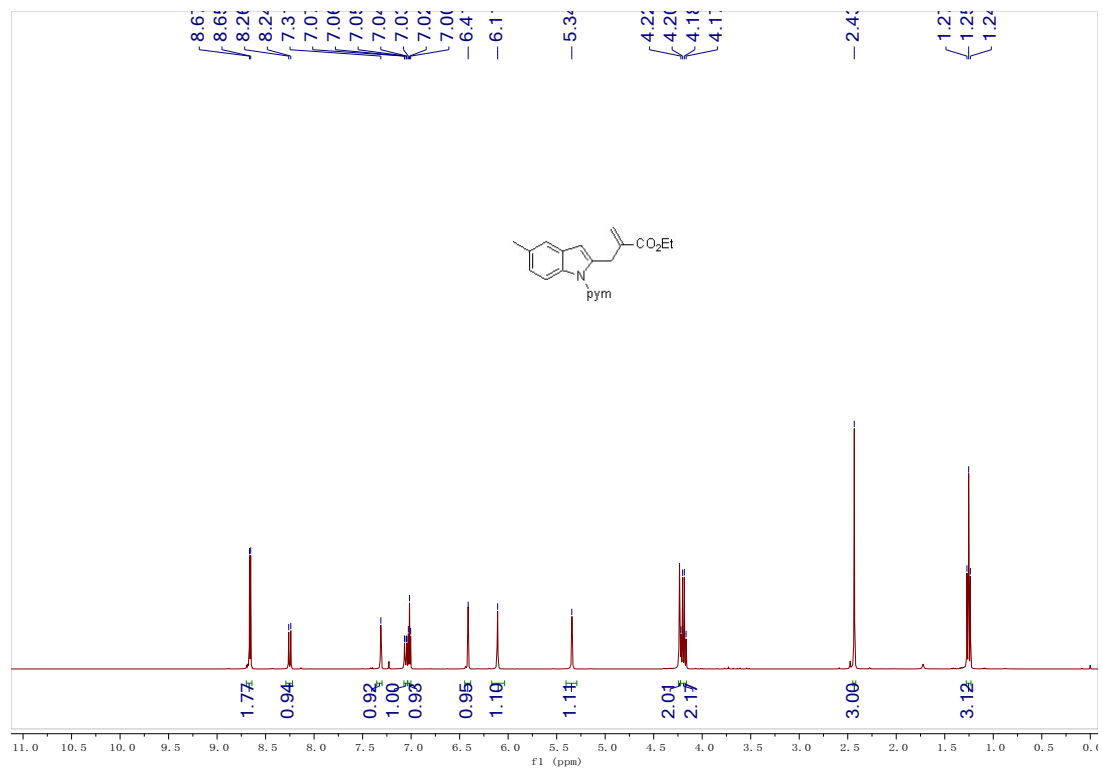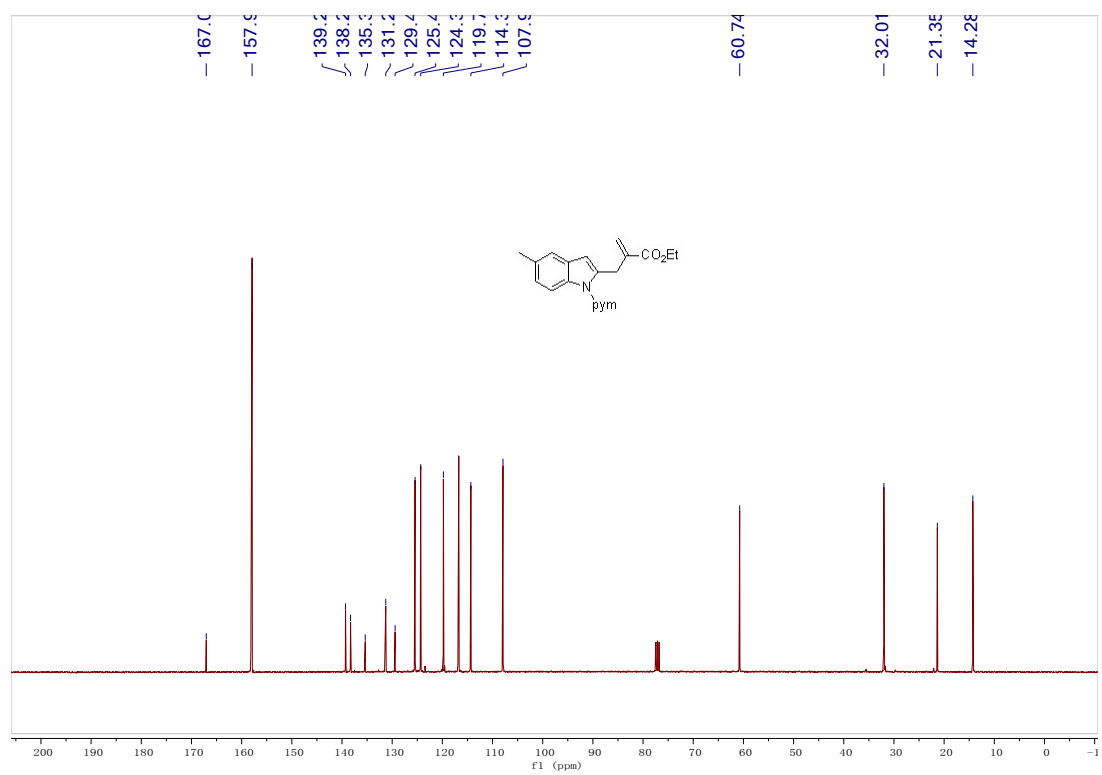

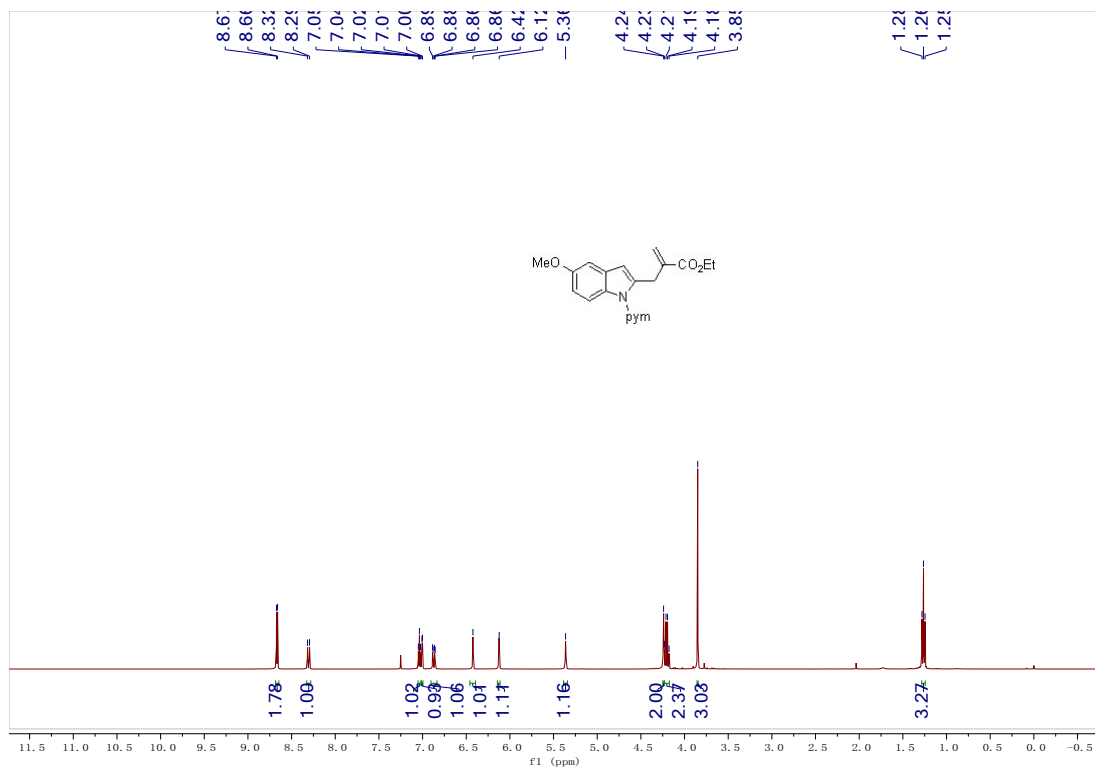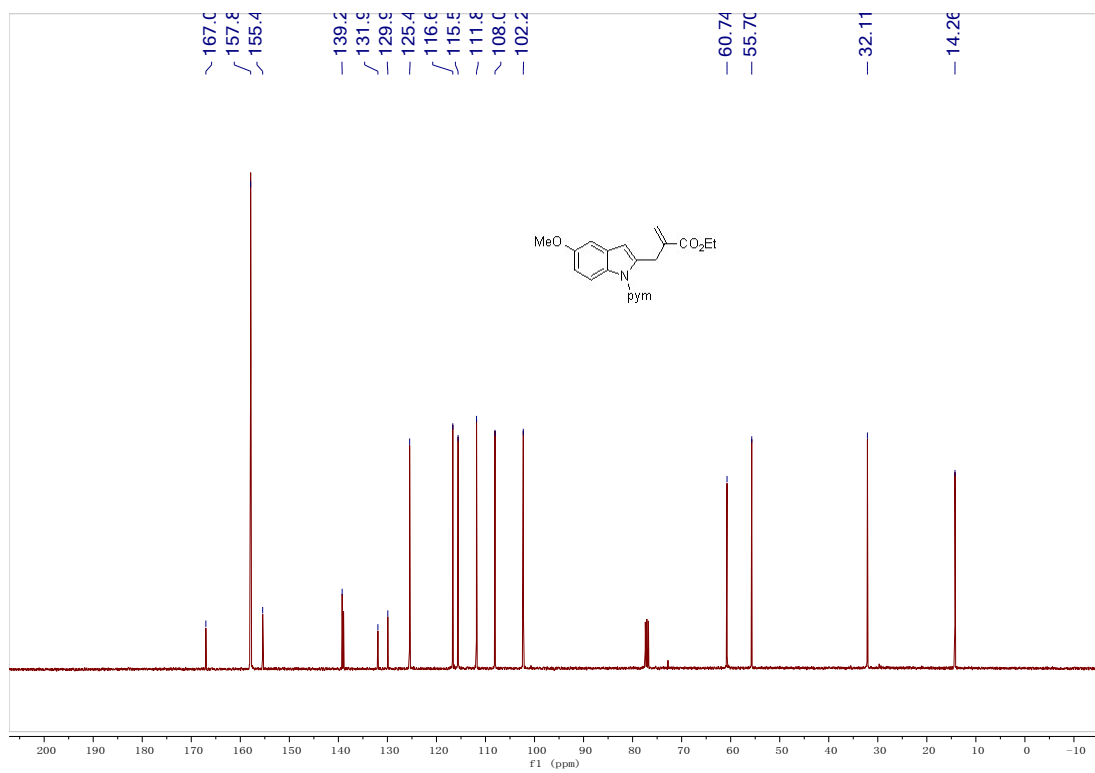

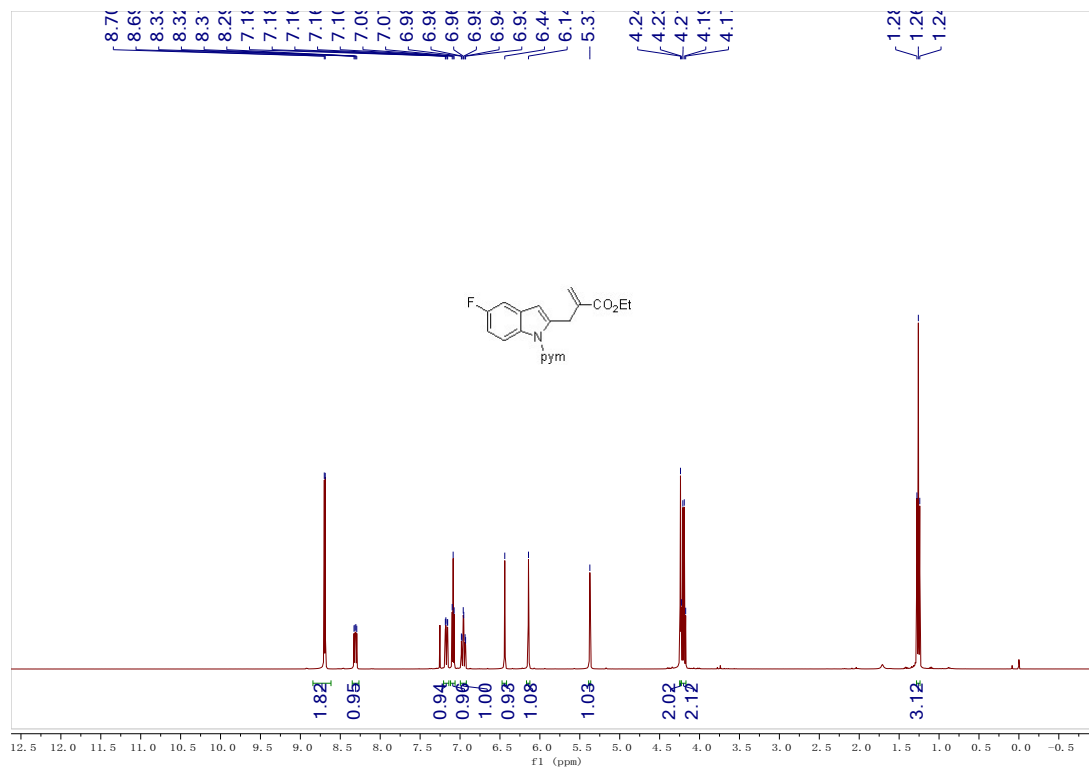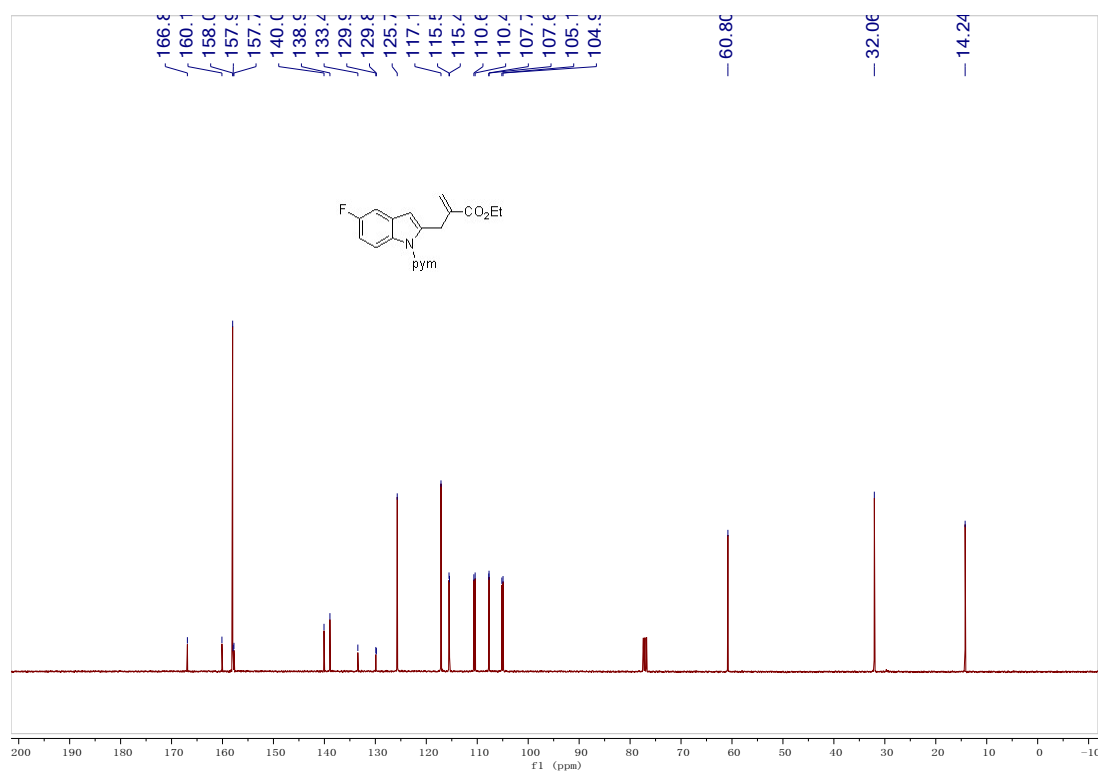



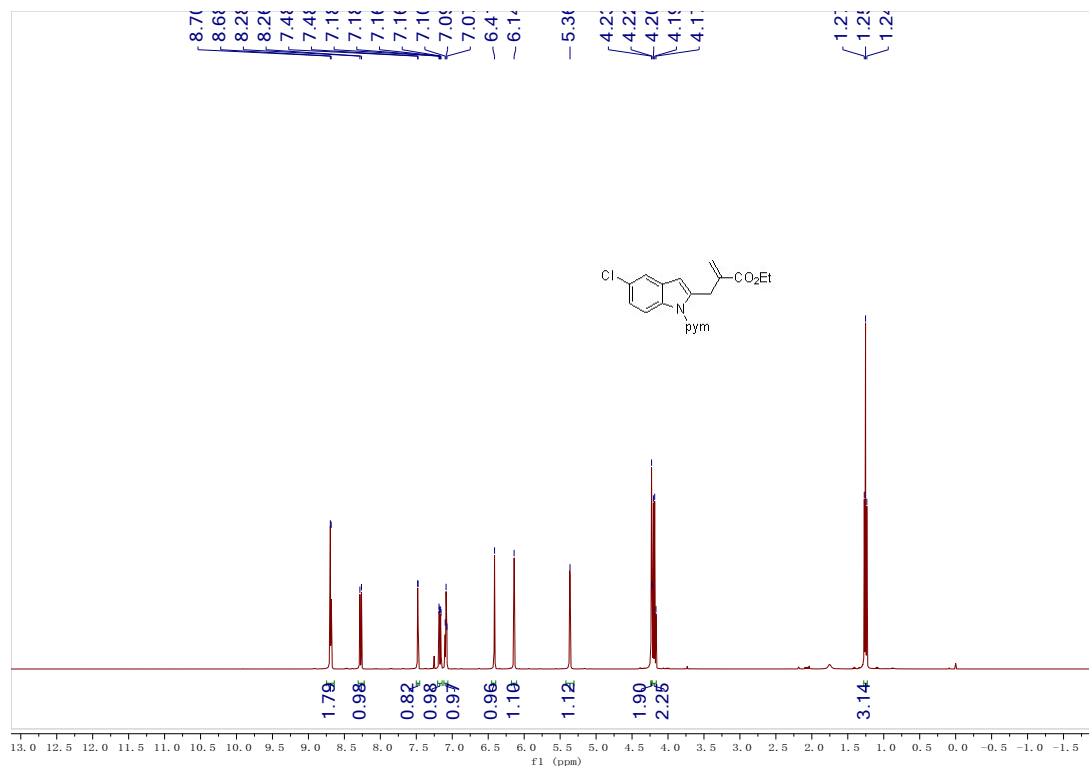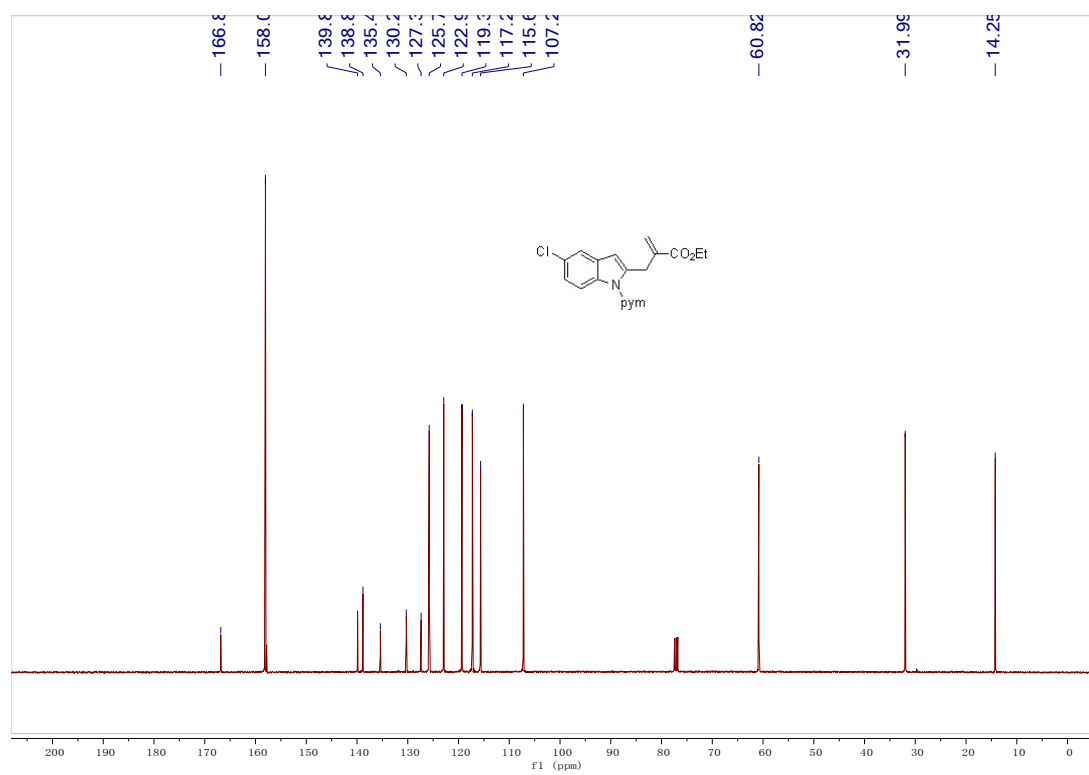

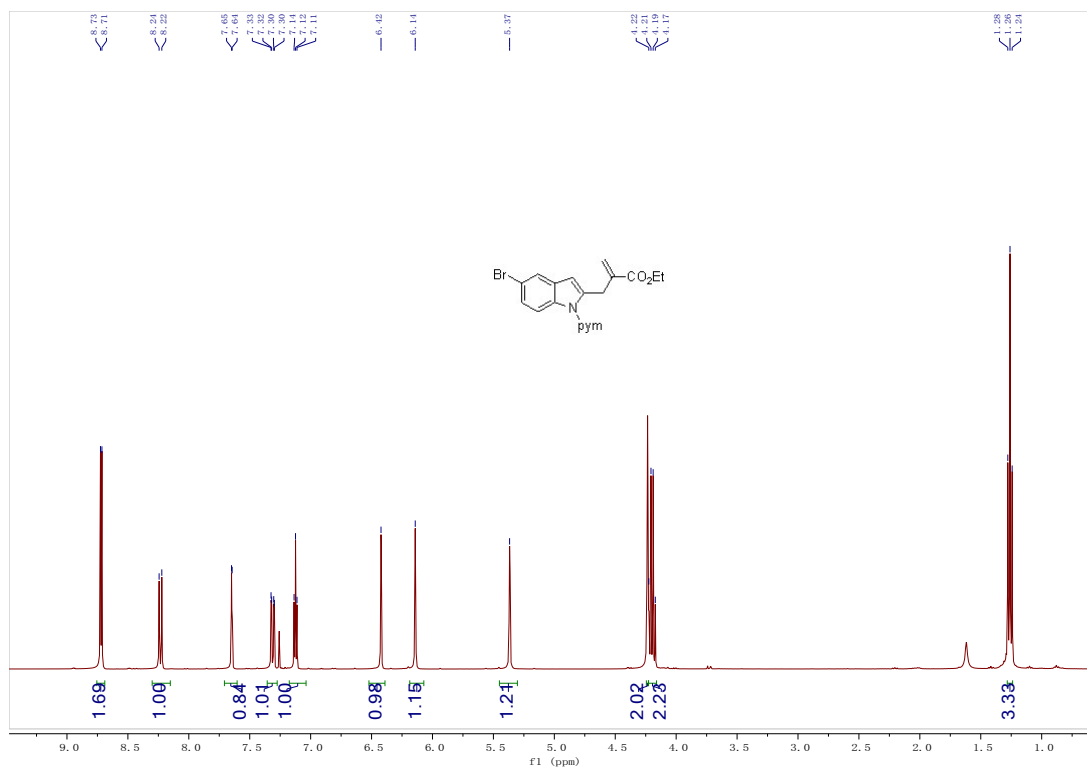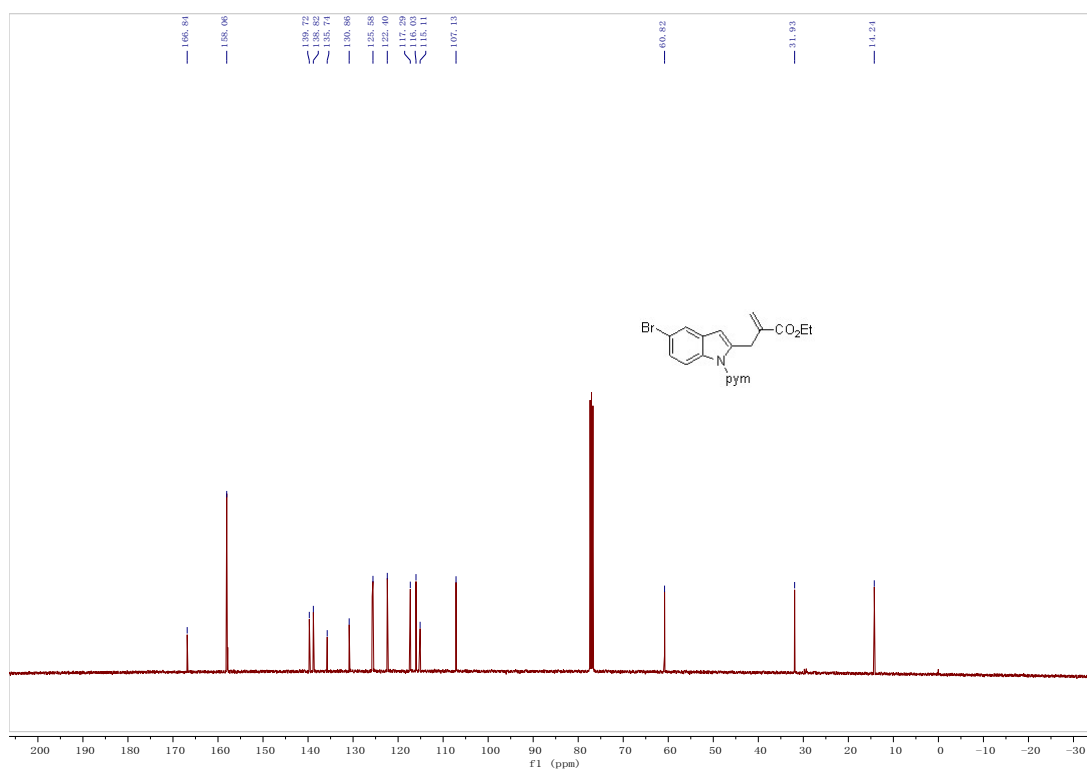

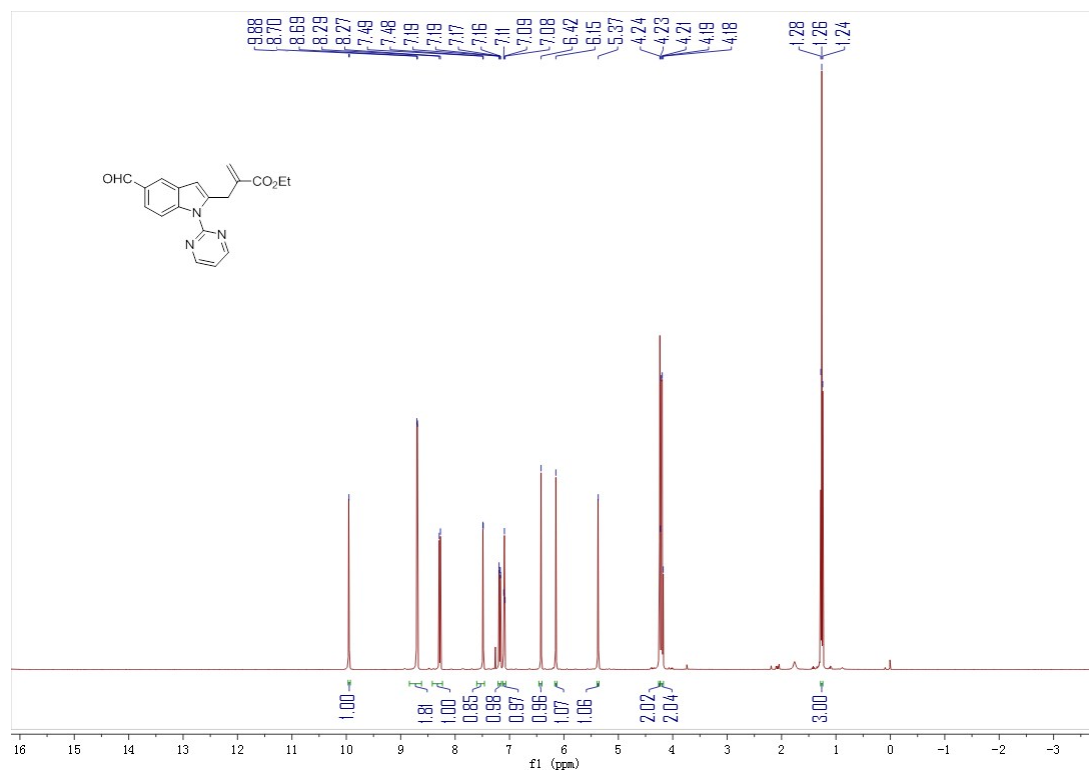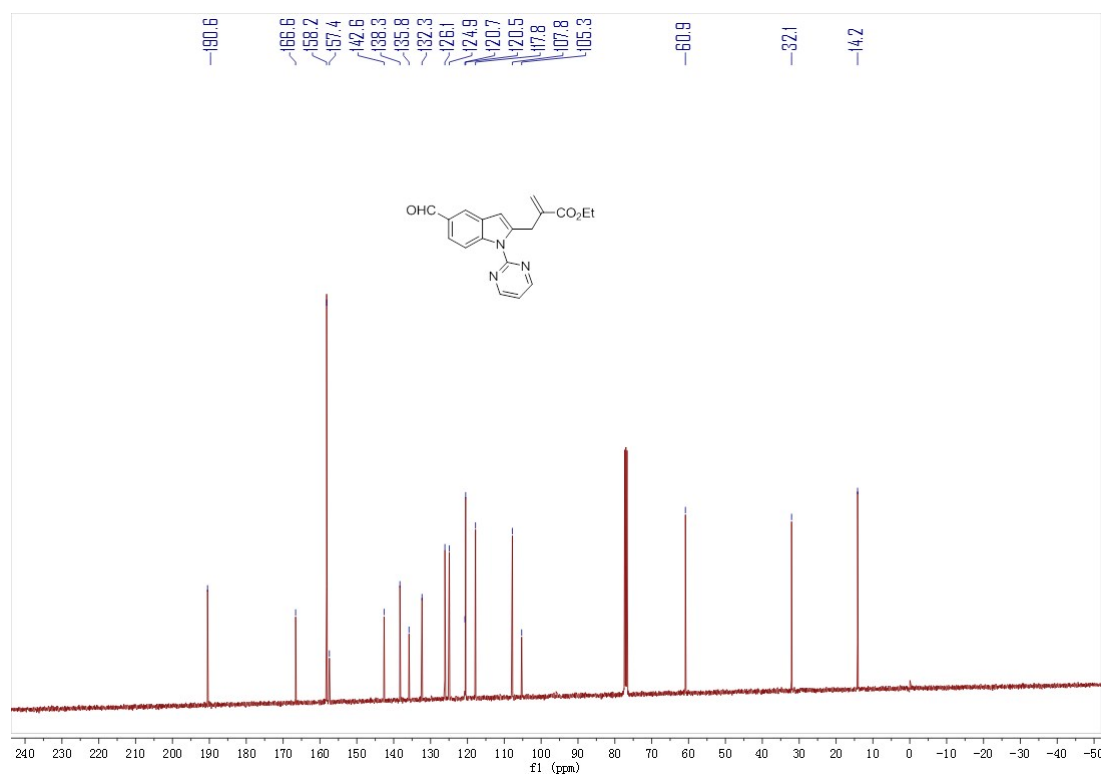

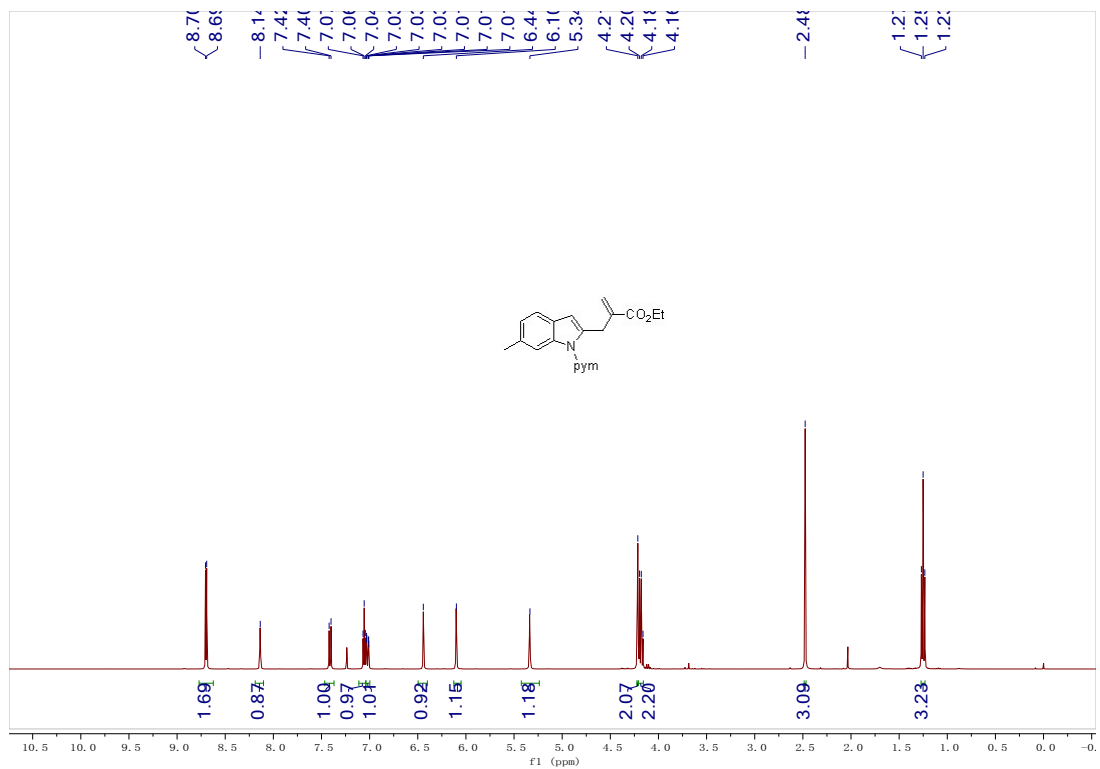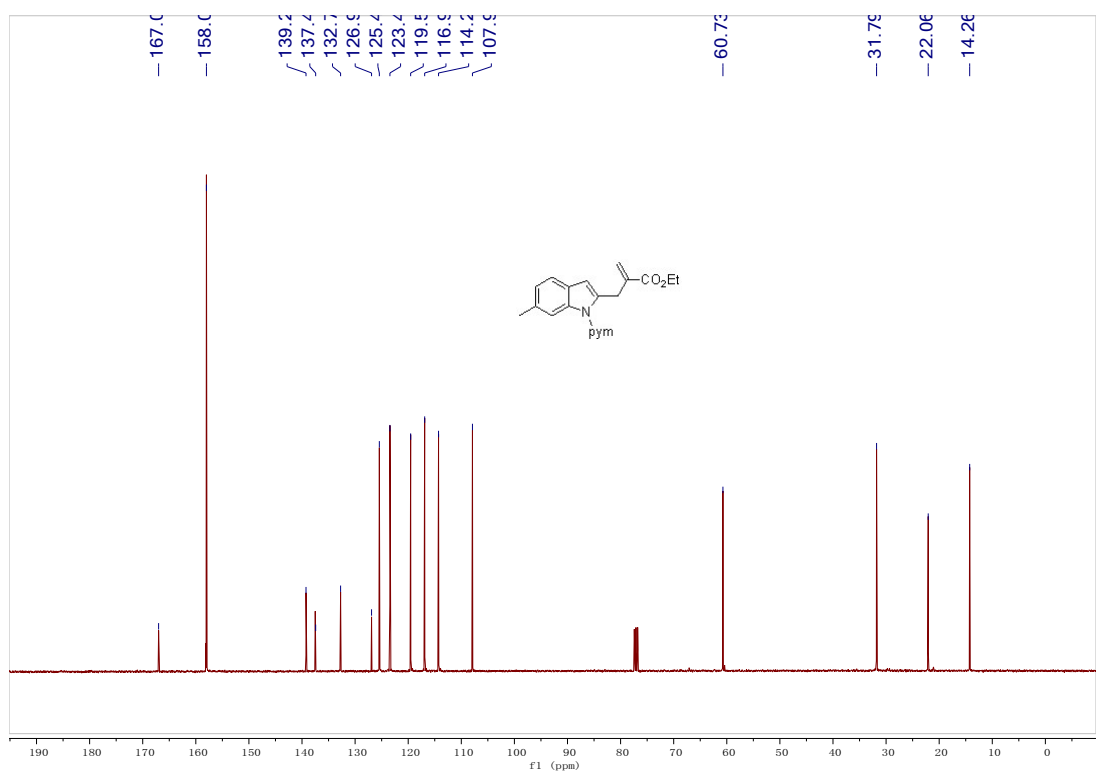

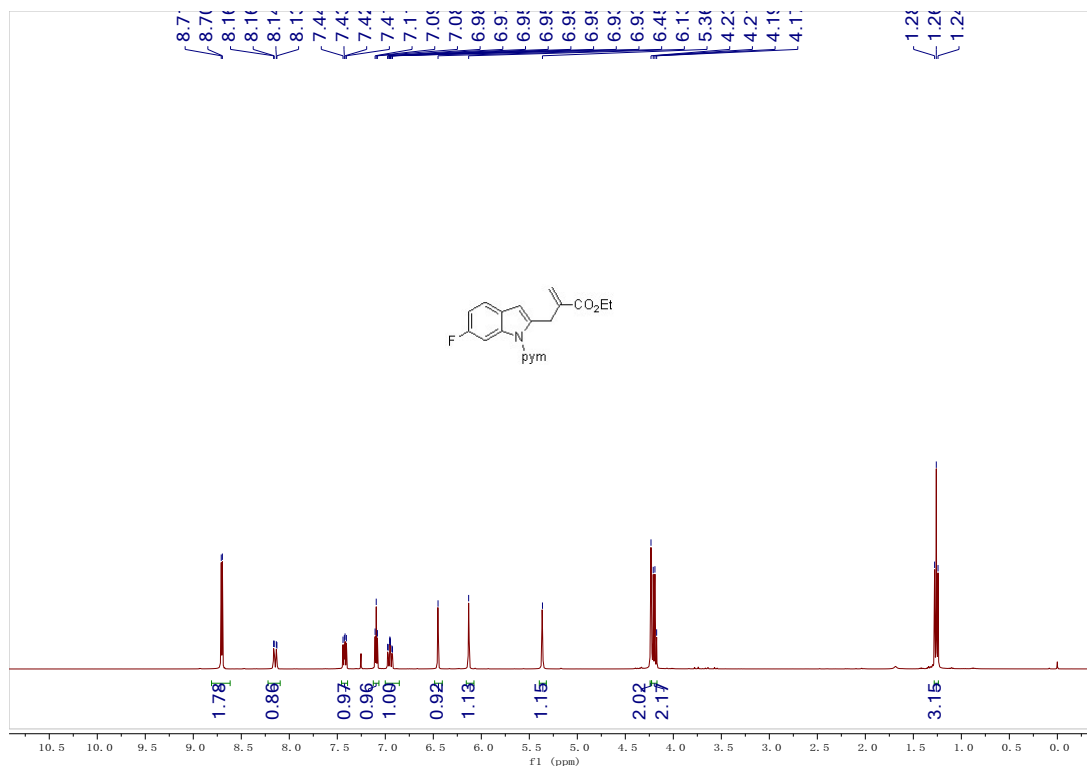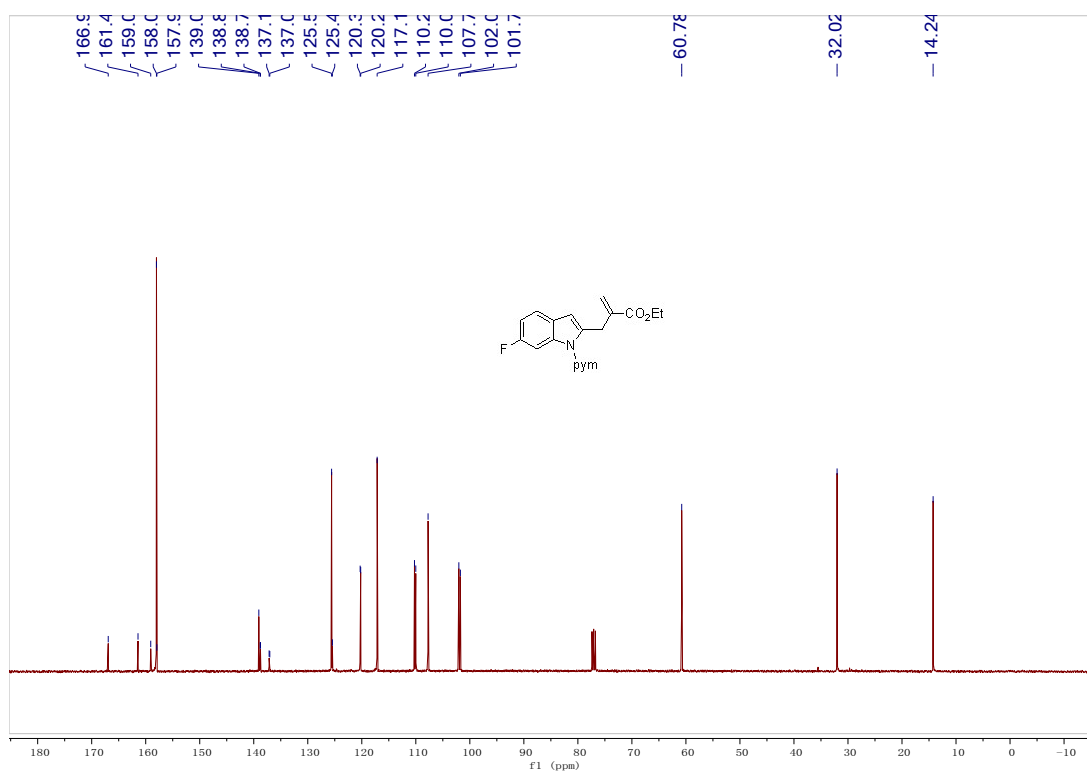

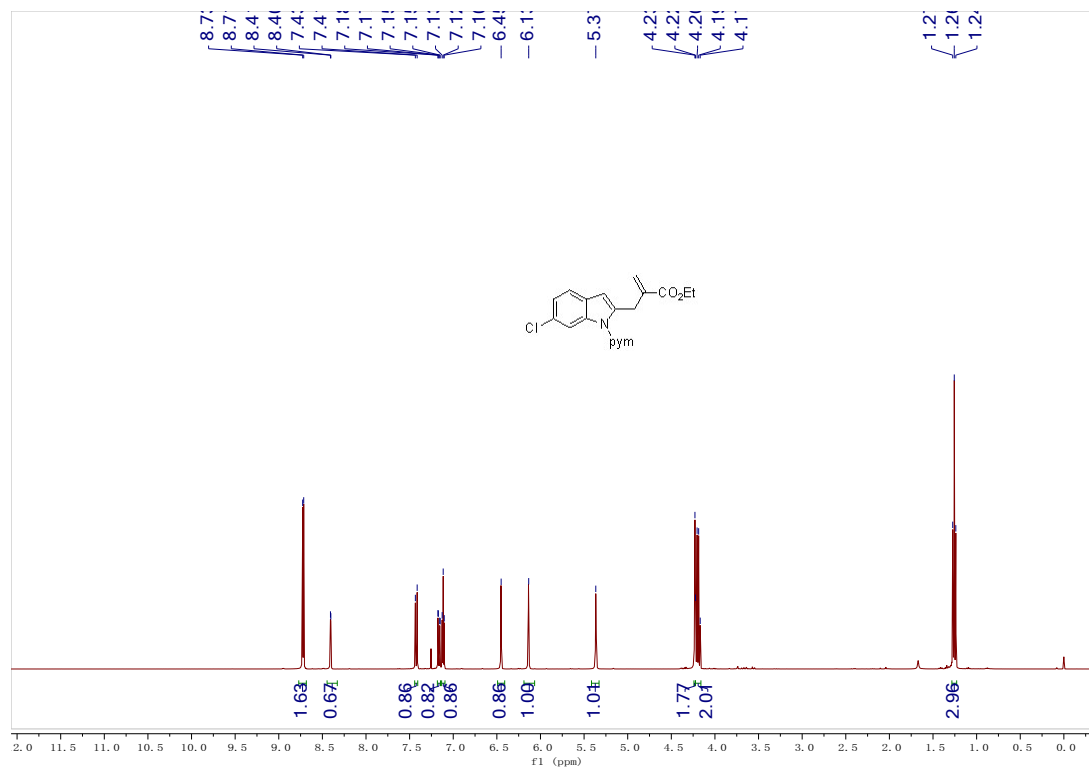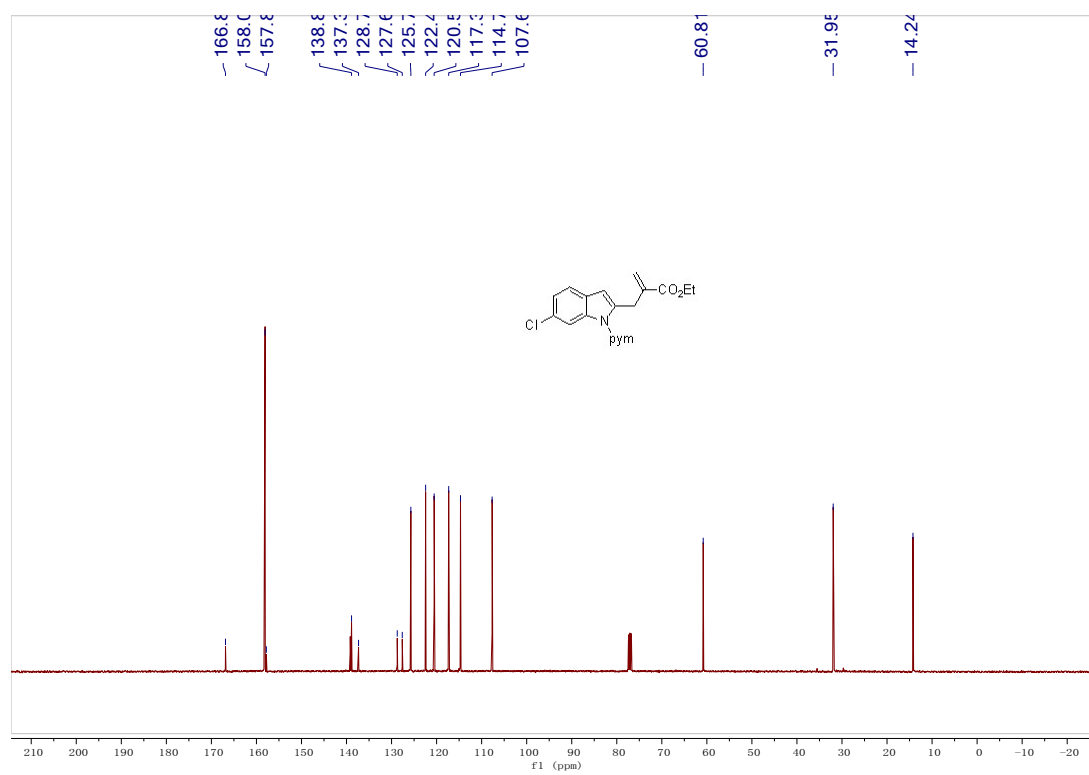

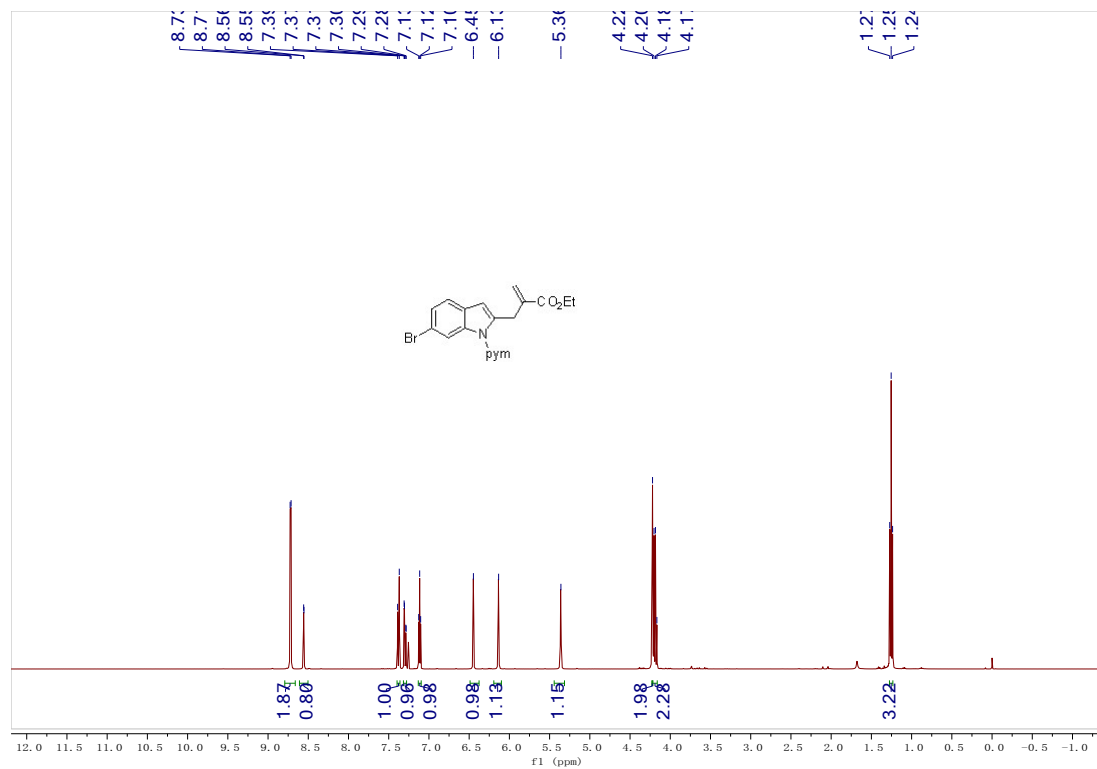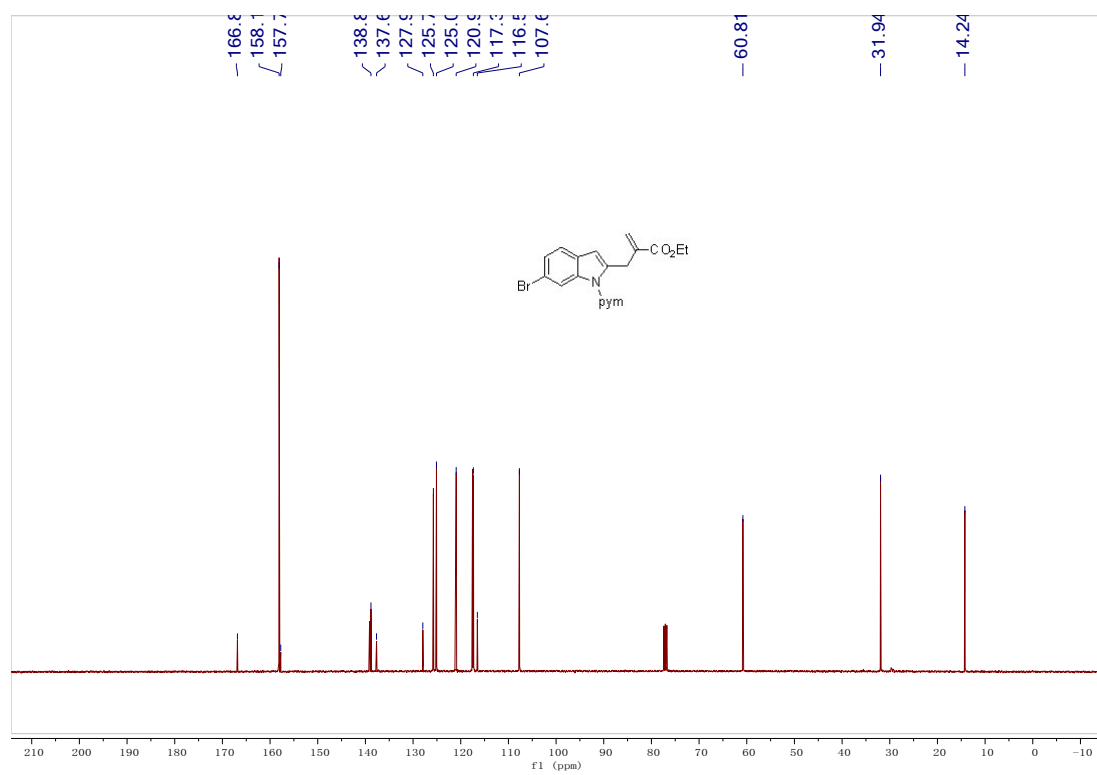

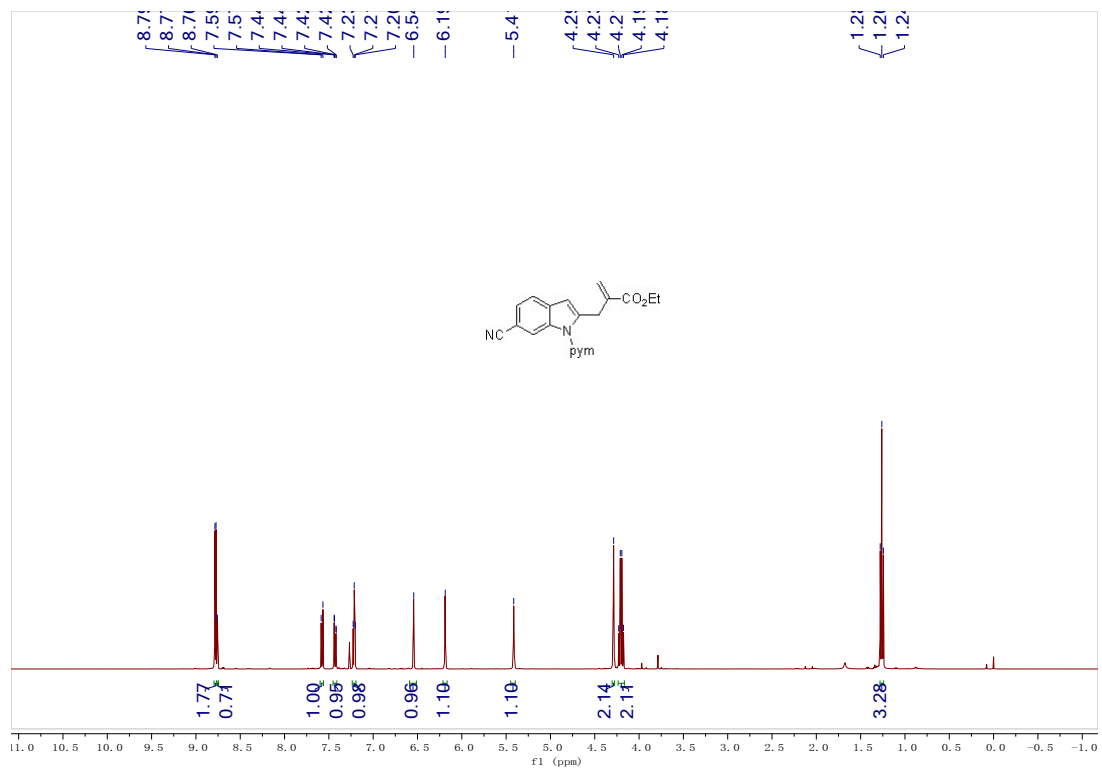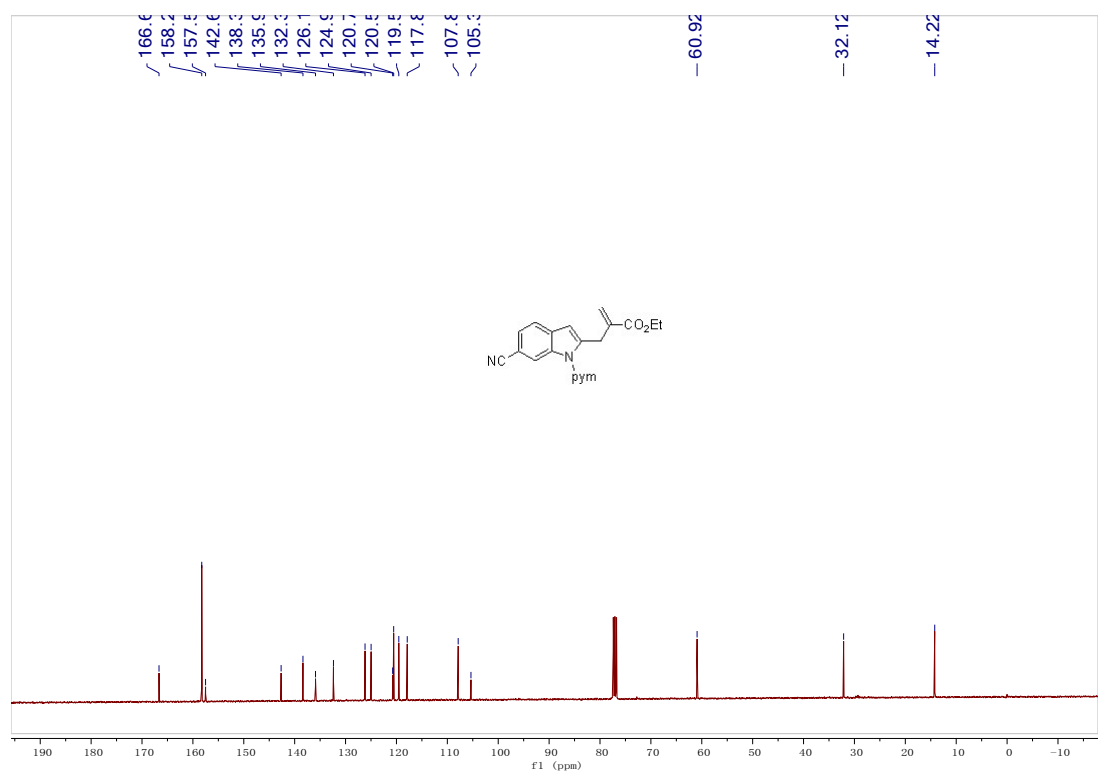



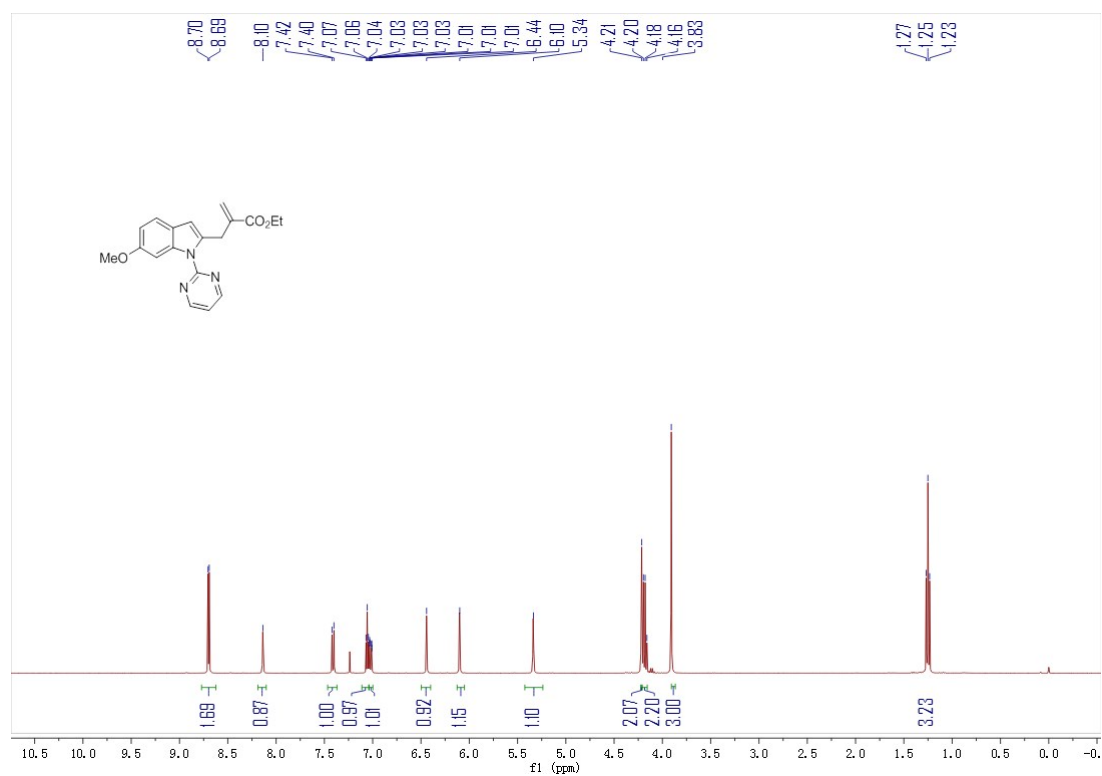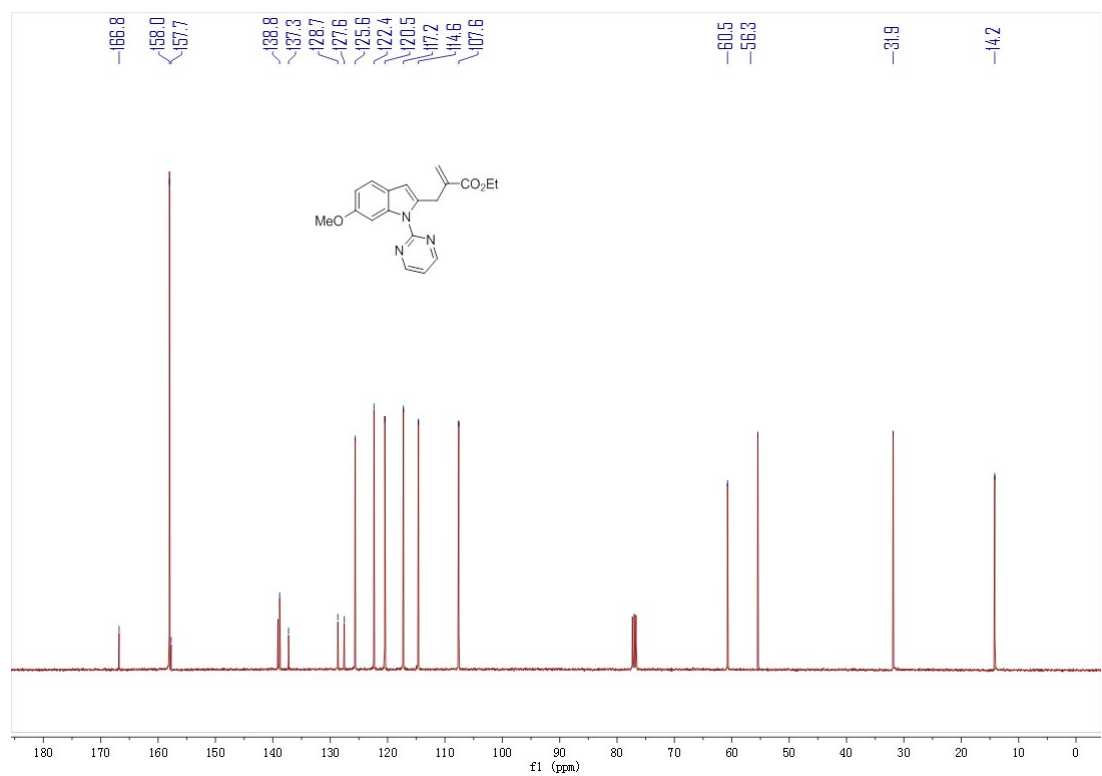

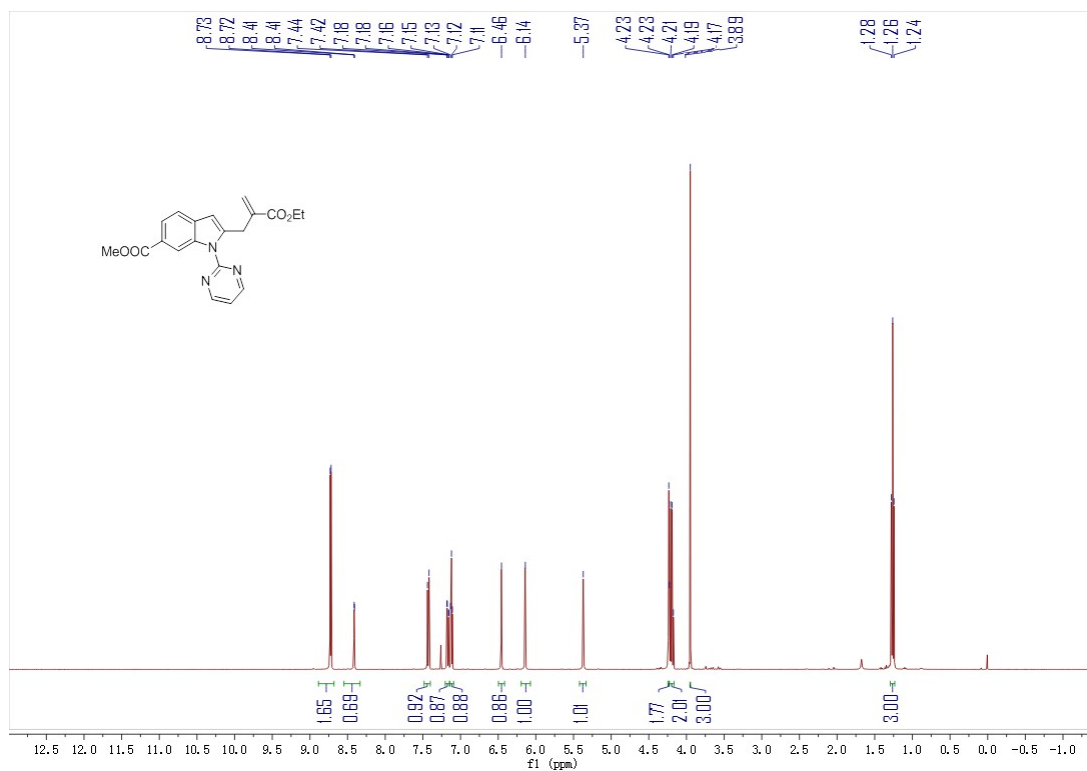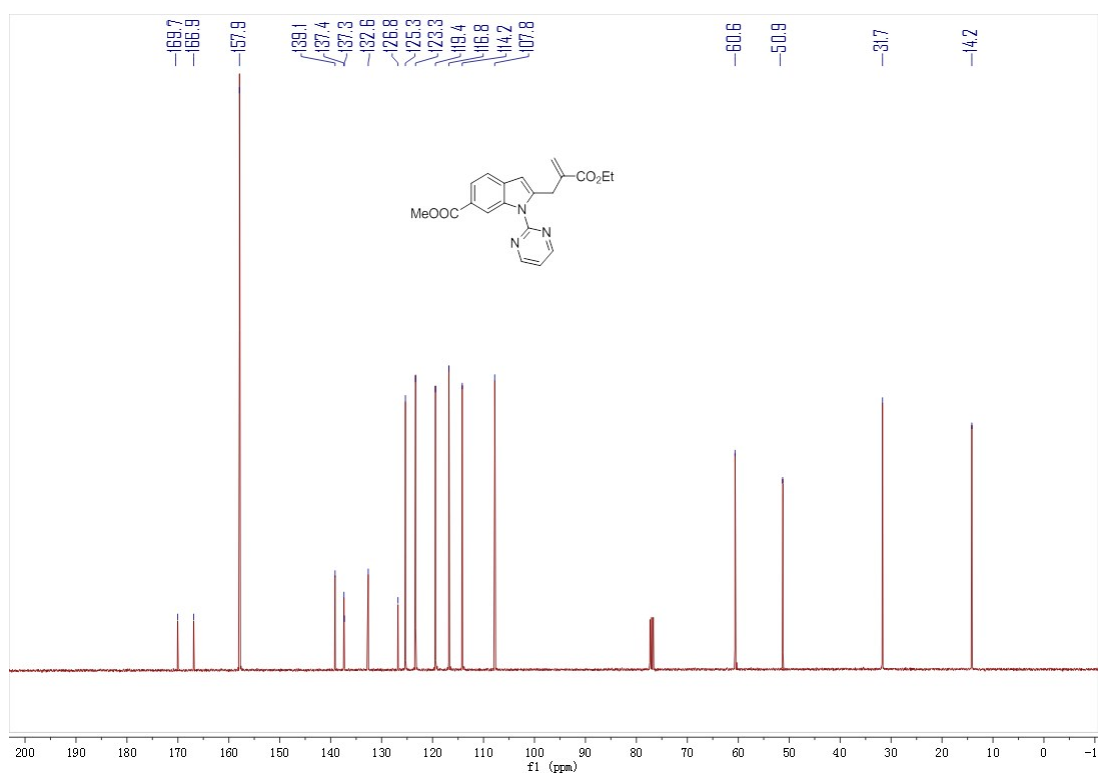

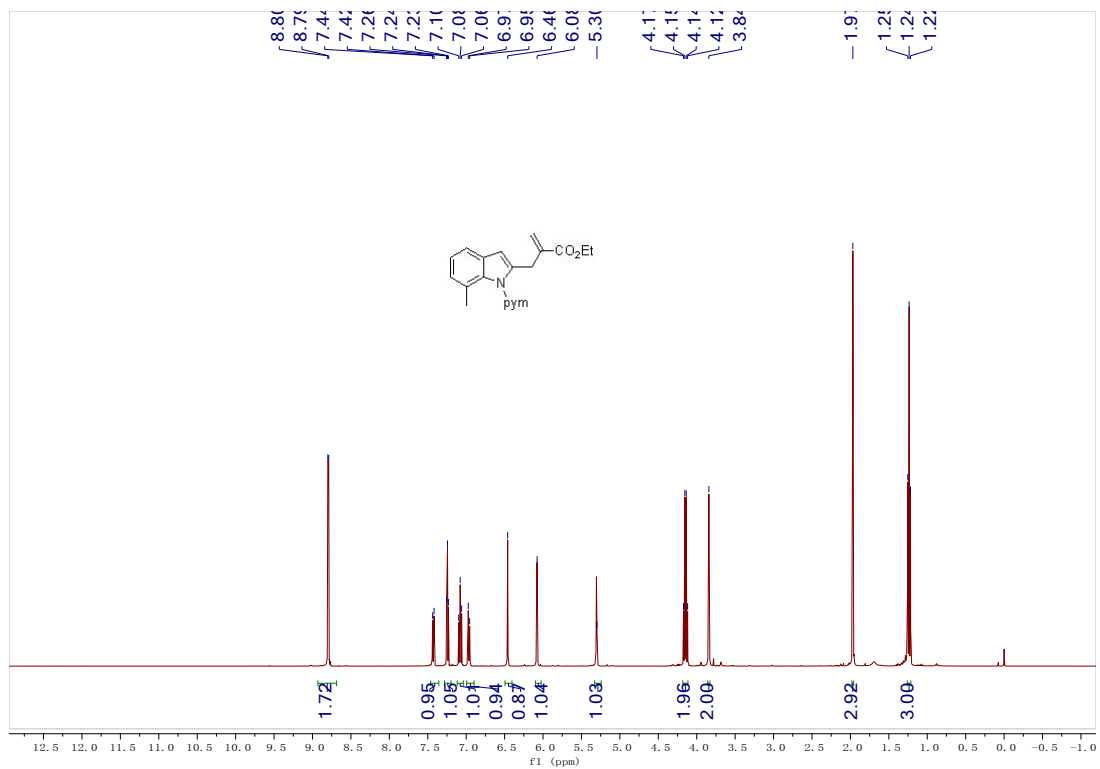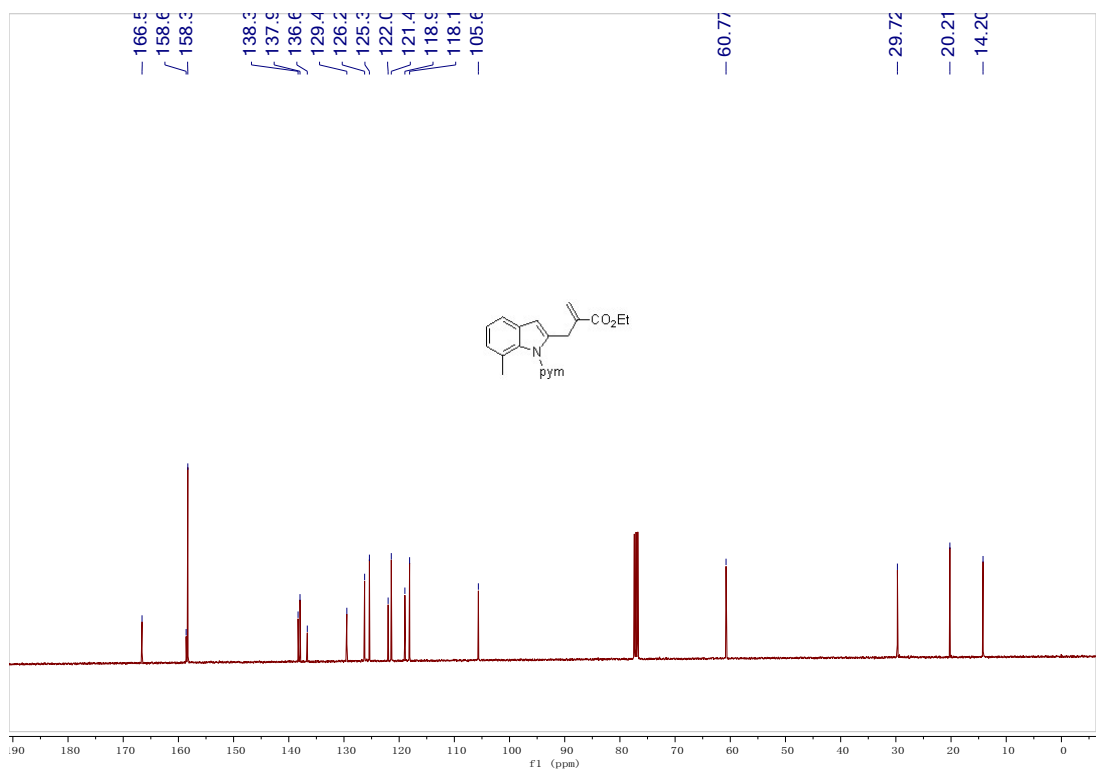

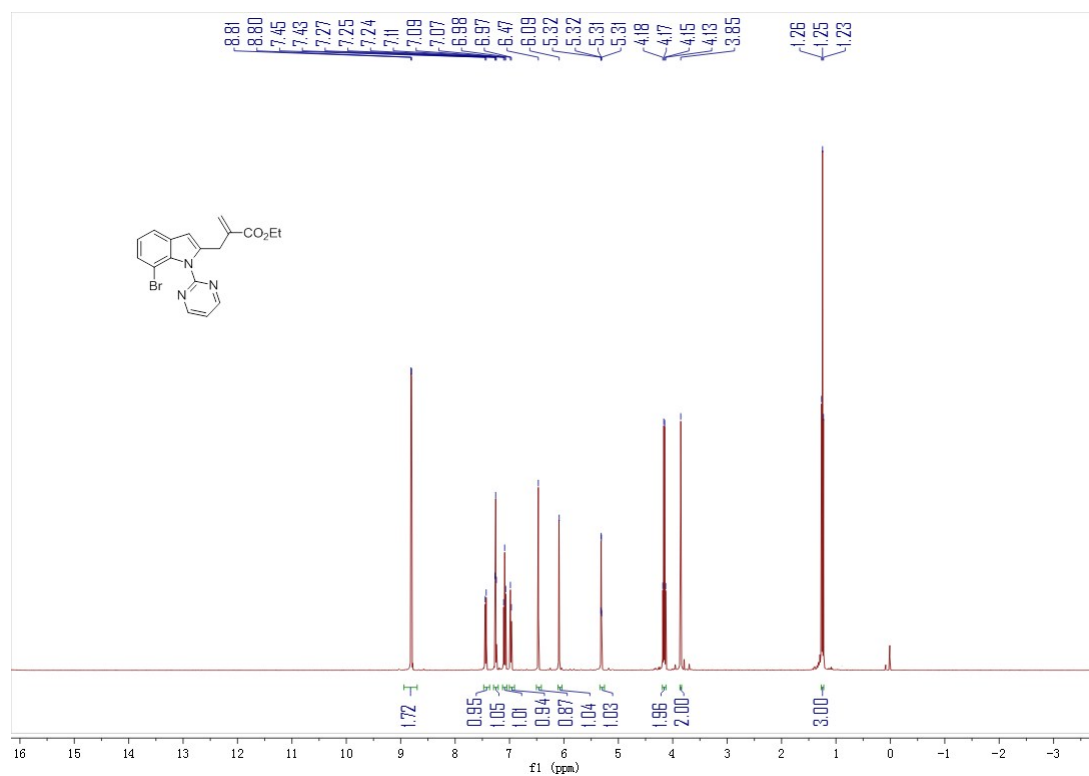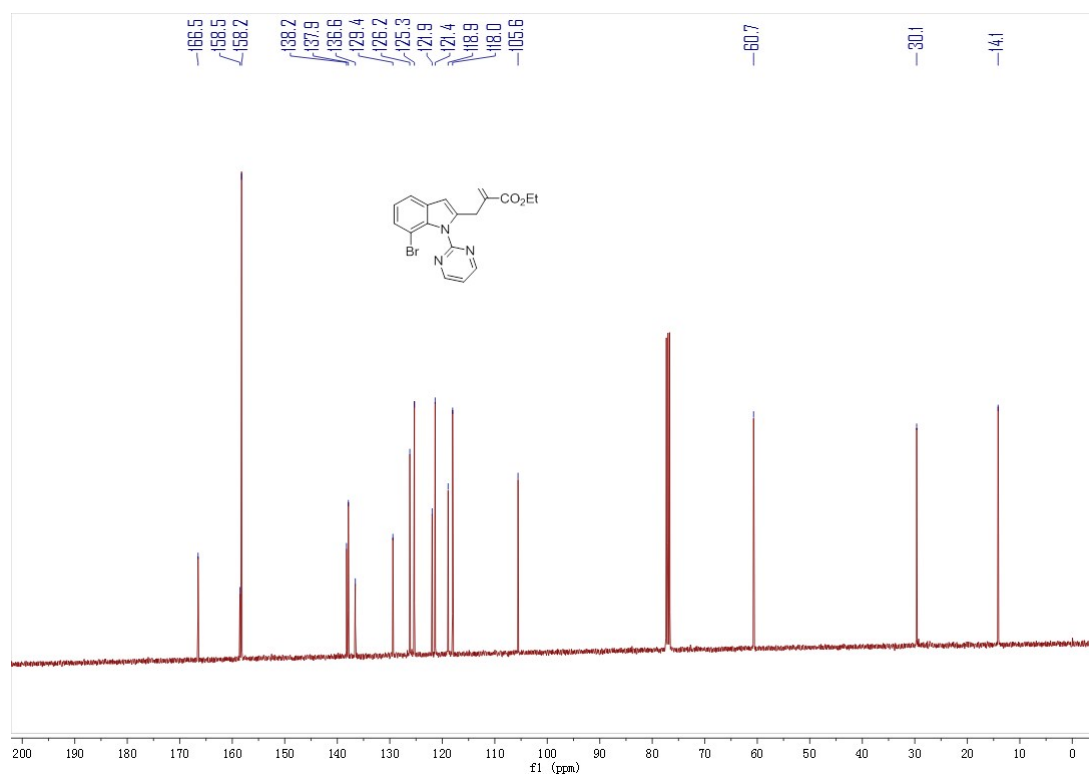

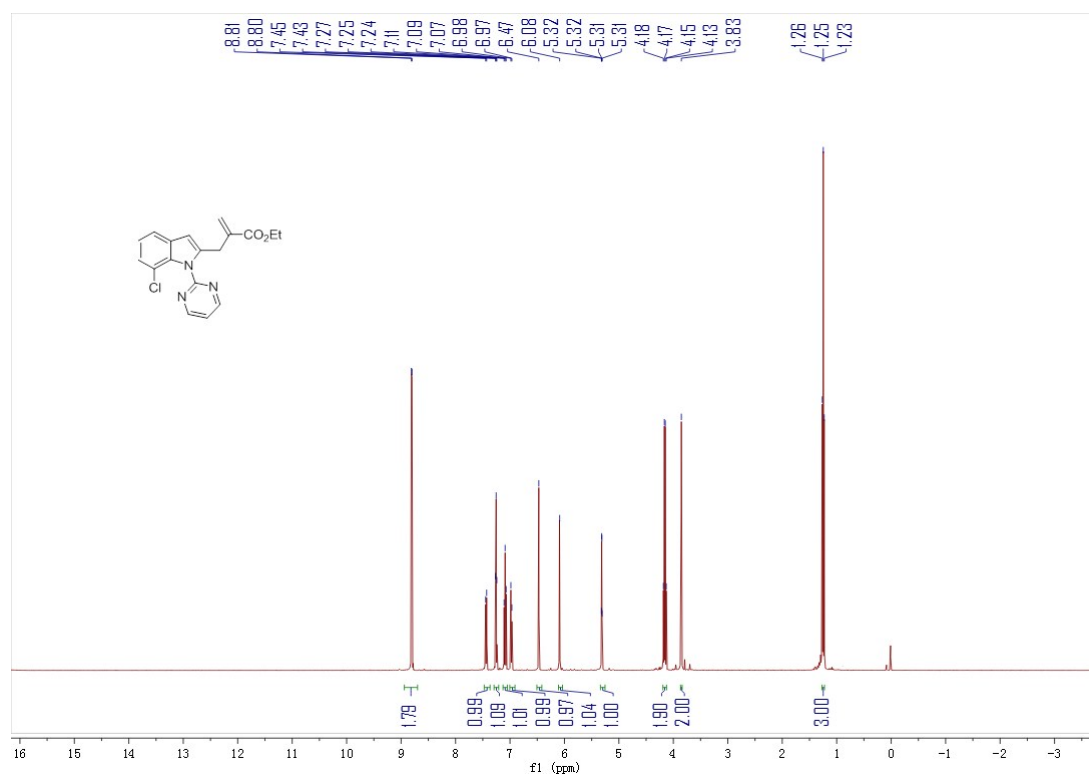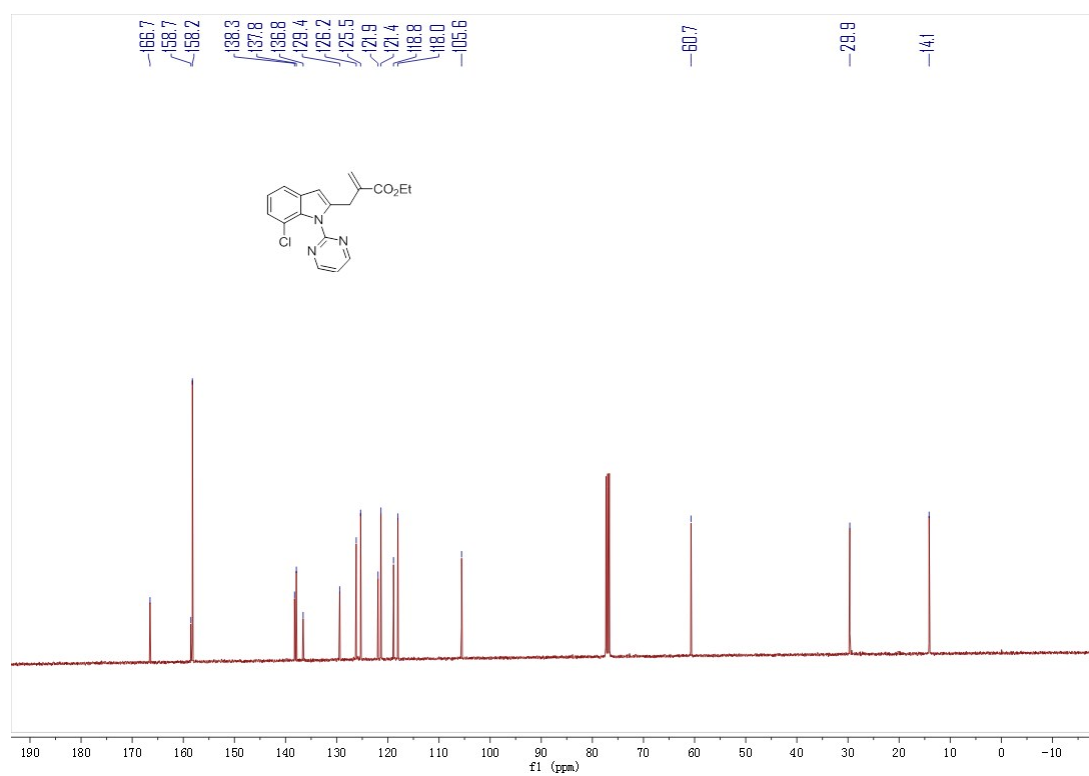

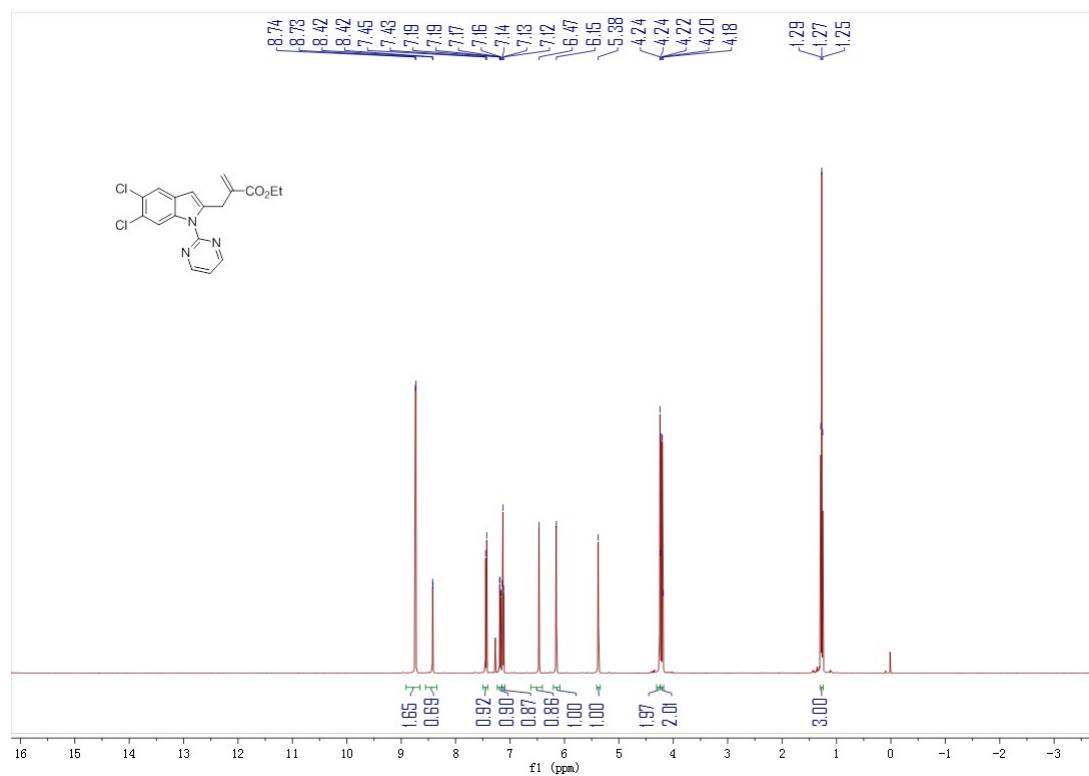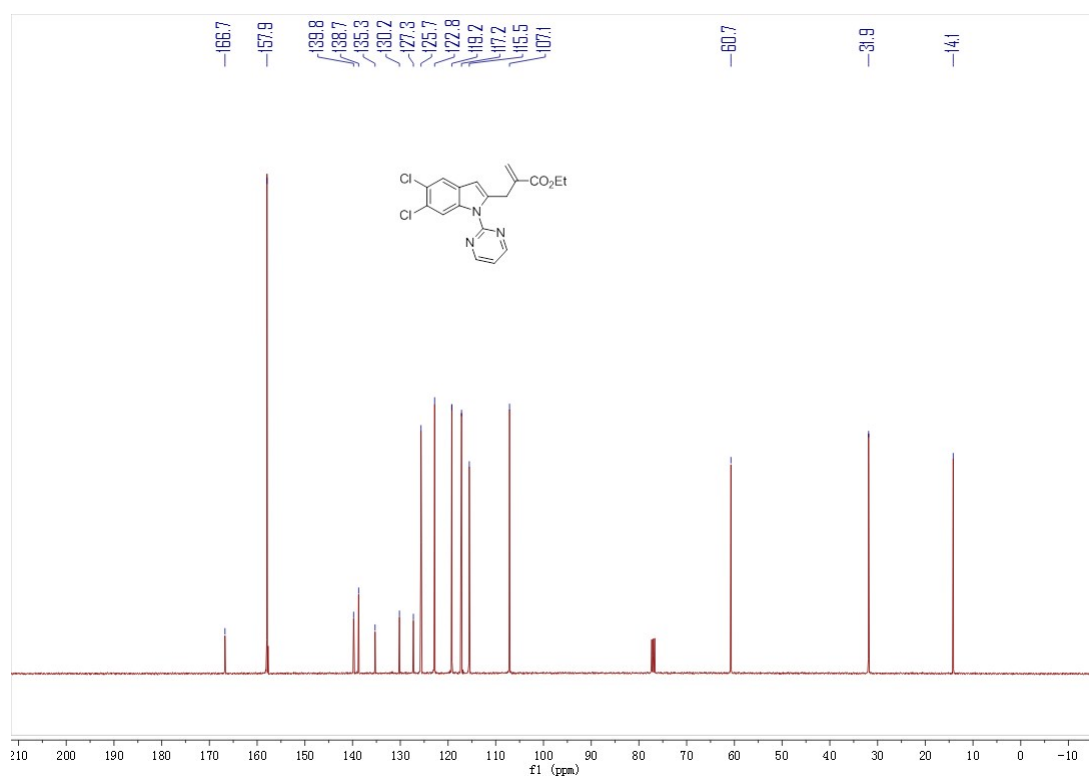



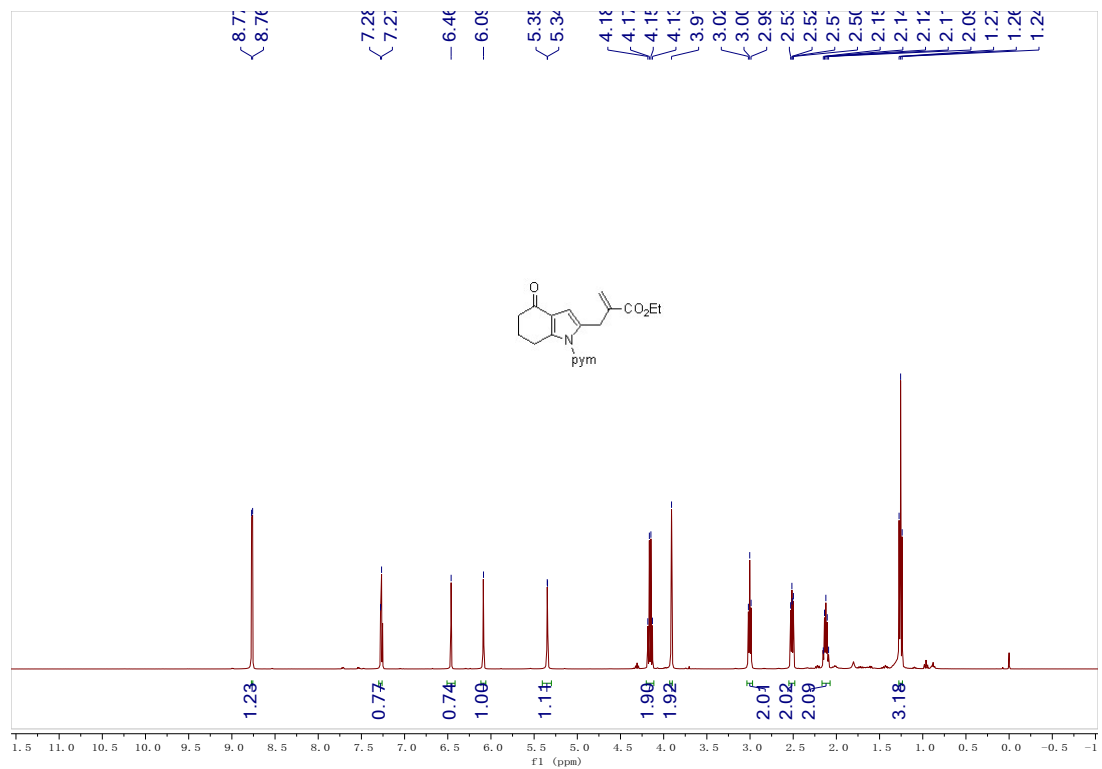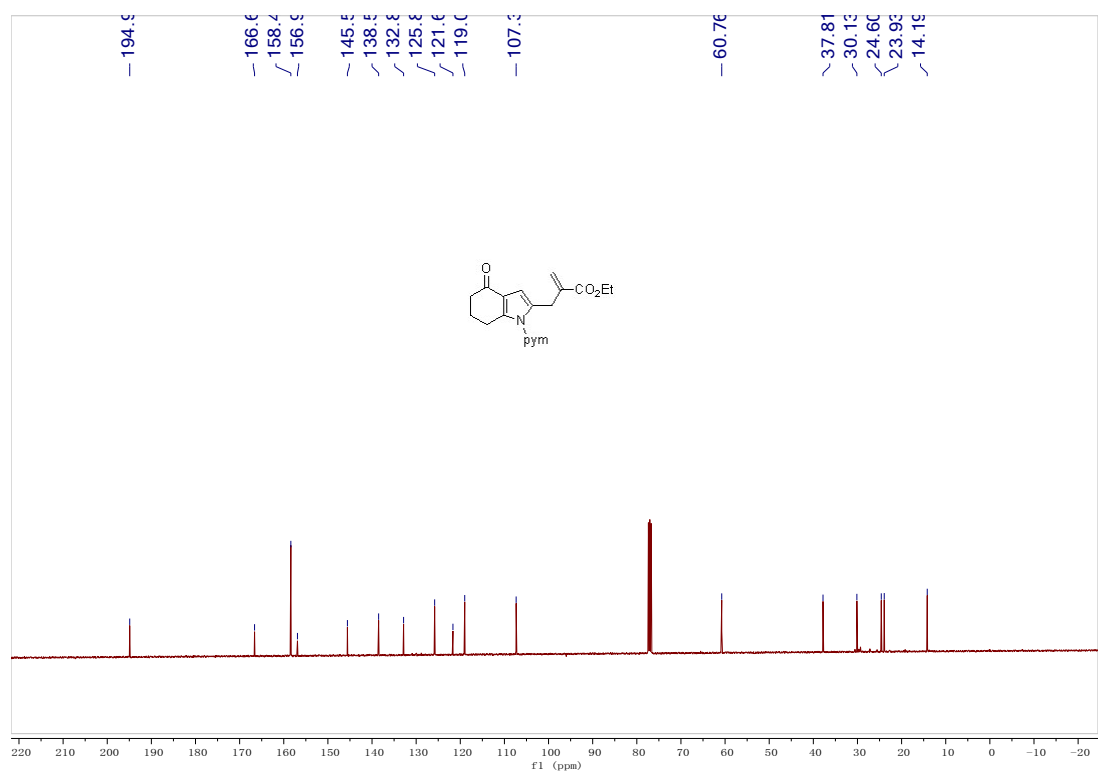



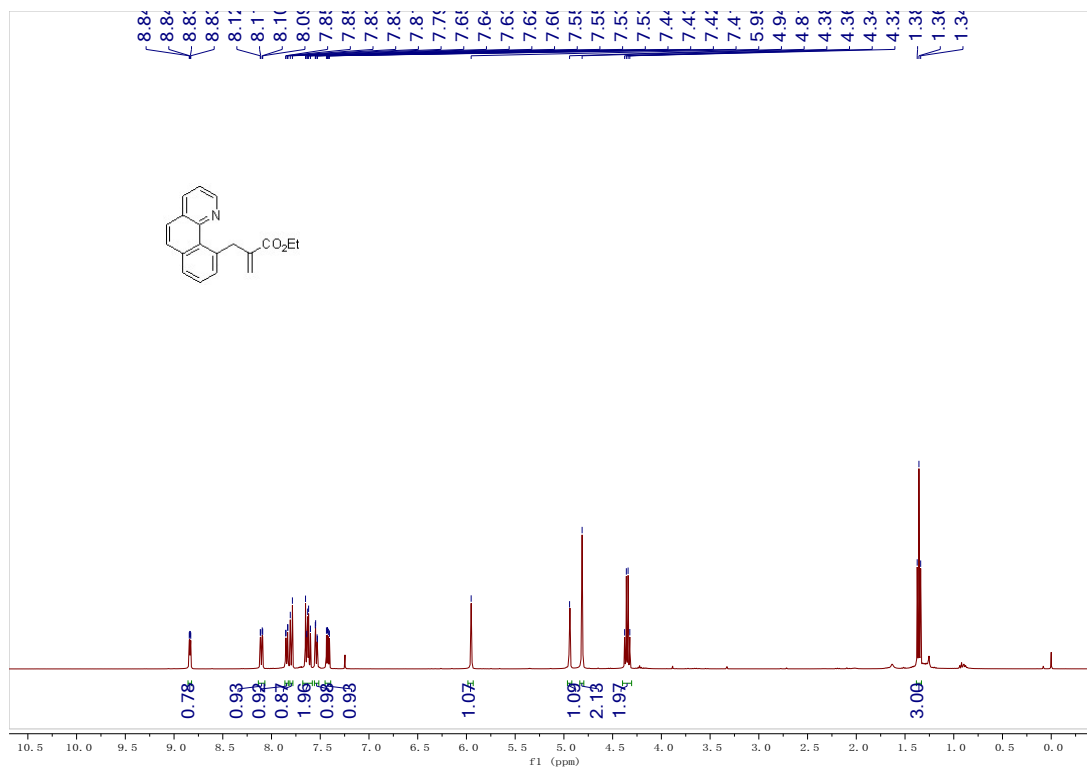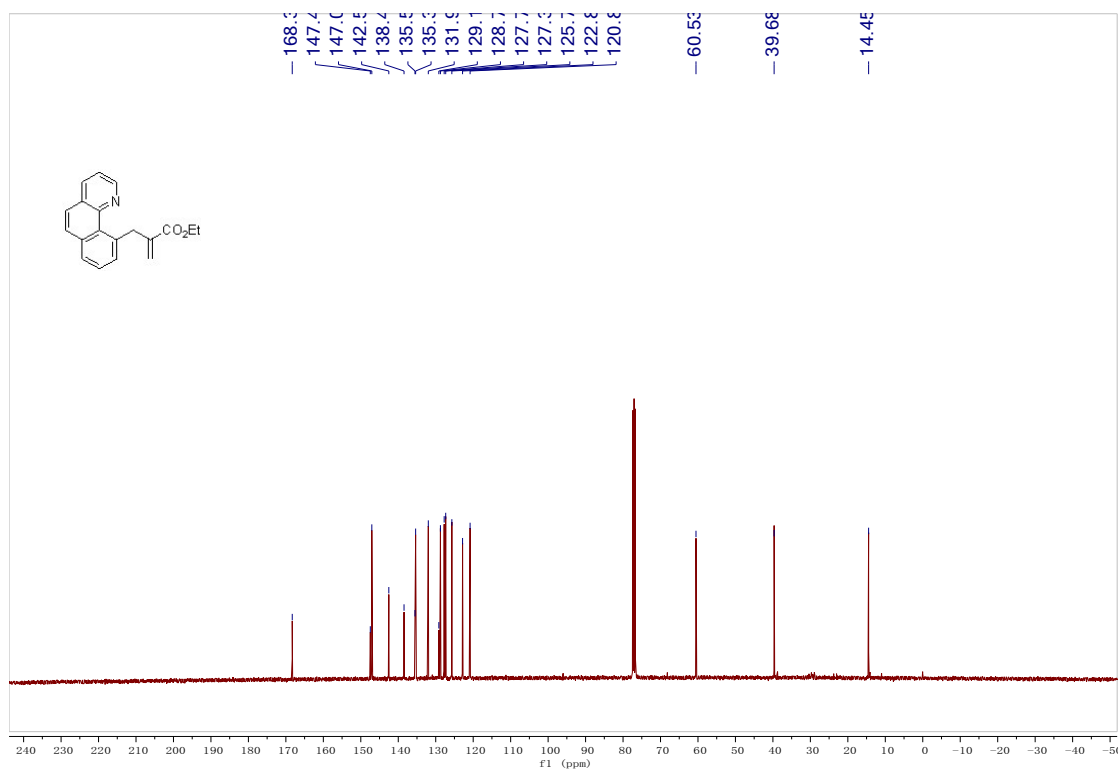

Supplement: c8qo00674a1.pdf [file c8qo00674a1.pdf]
